# Supplementary material
Source: publisher site journal article supplement (https://www.dovepress.com/article/331378)
Supplement: Supplementary file 1 [file get_supplementary_file.php]

**Supplementary Tables**

**Table S1** 246 genes (promoting factors: 150; inhibiting factors: 109; markers: 123) related to ferroptosis.

**Table S2** 67 differential genes associated with ferroptosis, including 26 down-regulated genes and 41 Upregulating genes.

**Table S3** KEGG analysis of those ferroptosis-associated genes.

**Table S4** 693 lncRNAs associated with ferroptosis.

**Table S5** 15 kinds of significantly differentially expressed lncRNA as independent prognostic factors for colorectal cancer.

**Table S6** Gene set enrichment analyses (GSEA)of the ferroptosis-associated lncRNAs.

**Table S1** 246 genes (promoting factors: 150; inhibiting factors: 109; markers: 123) related to ferroptosis.

Too much content in this table, the file will be uploaded as <https://www.dovepress.com/get_supplementary_file.php?f=331378.xlsx> separately.

**Table S2** 67 differential genes associated with ferroptosis, including 26 down-regulated genes and 41 Upregulating genes.

| gene | normal mean | tumor mean | logFC | pValue | FDR |
| --- | --- | --- | --- | --- | --- |
| RPL8 | 674.4343118 | 1420.019342 | 1.07416074 | 7.36E-19 | 2.77E-18 |
| ACSF2 | 14.3653532 | 6.129346479 | -1.2287883 | 4.46E-18 | 1.55E-17 |
| NOX4 | 0.057027145 | 0.496448177 | 3.1219224 | 2.06E-22 | 1.17E-21 |
| FLT3 | 0.386070087 | 0.127336353 | -1.600218427 | 1.04E-24 | 8.56E-24 |
| LPCAT3 | 9.297453569 | 4.496678071 | -1.047976037 | 1.01E-22 | 5.93E-22 |
| TFR2 | 0.139265216 | 1.224330115 | 3.136085737 | 5.82E-26 | 5.87E-25 |
| SLC1A5 | 36.28887851 | 87.60197564 | 1.271435935 | 1.14E-24 | 9.08E-24 |
| GLS2 | 0.046621124 | 0.294718628 | 2.660282546 | 1.21E-27 | 1.80E-26 |
| HMOX1 | 32.40944235 | 12.16788861 | -1.413335346 | 1.23E-21 | 6.66E-21 |
| ALOXE3 | 0.01013946 | 0.082708085 | 3.028047493 | 2.84E-13 | 7.08E-13 |
| BID | 6.585952627 | 14.39742151 | 1.128346417 | 1.75E-24 | 1.34E-23 |
| ZEB1 | 6.409252239 | 2.06050037 | -1.637161326 | 7.12E-12 | 1.58E-11 |
| CDKN2A | 0.292369631 | 2.452052265 | 3.06812436 | 6.11E-21 | 2.88E-20 |
| CDO1 | 0.826849469 | 0.324759899 | -1.348251202 | 1.20E-18 | 4.37E-18 |
| CHAC1 | 1.512860747 | 5.210270499 | 1.784079075 | 4.83E-21 | 2.33E-20 |
| PRKAA2 | 1.097139637 | 0.331890735 | -1.724966892 | 1.84E-19 | 7.43E-19 |
| ABCC1 | 5.566223 | 12.68894017 | 1.188800961 | 4.71E-24 | 3.17E-23 |
| EPAS1 | 40.7948649 | 19.6654669 | -1.052723124 | 4.22E-24 | 2.93E-23 |
| HILPDA | 3.182082706 | 17.69672316 | 2.475439007 | 8.87E-31 | 4.92E-29 |
| IFNG | 0.153445475 | 0.334586273 | 1.124652156 | 0.000314212 | 0.000425335 |
| MIOX | 0.021141965 | 0.249864471 | 3.56296442 | 2.41E-14 | 6.61E-14 |
| TAZ | 3.342038294 | 7.318311465 | 1.130782553 | 1.82E-24 | 1.35E-23 |
| DUSP1 | 113.1257322 | 55.12235528 | -1.037217691 | 1.67E-13 | 4.20E-13 |
| GPX2 | 210.1152653 | 479.8599722 | 1.191432494 | 1.41E-15 | 4.28E-15 |
| ANGPTL7 | 2.049034669 | 0.119150701 | -4.104085053 | 9.53E-30 | 4.23E-28 |
| SLC7A11 | 0.441505168 | 2.938546284 | 2.734600392 | 1.42E-26 | 1.75E-25 |
| DDIT4 | 15.38049998 | 46.55452512 | 1.597819003 | 3.67E-21 | 1.81E-20 |
| ASNS | 5.107293627 | 14.8406356 | 1.538921972 | 6.89E-26 | 6.65E-25 |
| TSC22D3 | 23.36694243 | 10.17758195 | -1.199074131 | 1.84E-12 | 4.33E-12 |
| TXNIP | 322.4641176 | 122.2936161 | -1.398789538 | 5.35E-25 | 4.75E-24 |
| VLDLR | 1.704029818 | 0.823586407 | -1.048958656 | 3.20E-14 | 8.67E-14 |
| GPT2 | 3.980448706 | 13.88593858 | 1.802621718 | 3.07E-27 | 4.01E-26 |
| PSAT1 | 4.272384216 | 30.80923537 | 2.850249578 | 4.13E-28 | 1.02E-26 |
| SLC7A5 | 5.228432529 | 46.45133886 | 3.15126978 | 4.75E-31 | 3.52E-29 |
| SLC3A2 | 16.80878122 | 40.675806 | 1.274955813 | 5.79E-28 | 1.28E-26 |
| TRIB3 | 1.770493629 | 27.57631938 | 3.961206355 | 3.43E-32 | 3.80E-30 |
| ZFP69B | 0.416346583 | 1.128099347 | 1.438037237 | 2.09E-21 | 1.08E-20 |
| ATP6V1G2 | 0.785024892 | 0.153336543 | -2.356036846 | 2.69E-27 | 3.73E-26 |
| VEGFA | 4.248134569 | 13.55534532 | 1.673960494 | 7.32E-29 | 2.71E-27 |
| GDF15 | 12.03794837 | 99.98121707 | 3.054067554 | 1.22E-27 | 1.80E-26 |
| BLOC1S5-TXNDC5 | 0.102256625 | 0.032221812 | -1.666084773 | 2.96E-19 | 1.15E-18 |
| CXCL2 | 3.572165045 | 19.65437638 | 2.459979944 | 2.34E-20 | 1.02E-19 |
| HSD17B11 | 100.3335776 | 44.34265556 | -1.178037422 | 5.12E-25 | 4.73E-24 |
| HAMP | 0.051819916 | 0.551564707 | 3.411951577 | 6.80E-08 | 1.22E-07 |
| DRD5 | 0.561682738 | 0.100535387 | -2.48205206 | 9.37E-10 | 1.84E-09 |
| DRD4 | 0.322148873 | 0.709124756 | 1.138311916 | 9.22E-07 | 1.54E-06 |
| SLC2A1 | 16.86093194 | 62.93225477 | 1.900115354 | 8.09E-21 | 3.74E-20 |
| SLC2A8 | 6.090999275 | 13.29988164 | 1.126662569 | 1.47E-14 | 4.25E-14 |
| SLC2A12 | 0.537576807 | 1.985340813 | 1.884843888 | 6.37E-12 | 1.43E-11 |
| PLIN4 | 11.03185625 | 1.583661397 | -2.800339752 | 6.61E-20 | 2.77E-19 |
| RRM2 | 8.976890653 | 25.39770758 | 1.500410557 | 6.52E-24 | 4.26E-23 |
| NGB | 0.921782958 | 0.031300113 | -4.880187344 | 1.69E-36 | 3.75E-34 |
| AURKA | 6.110931647 | 19.74191632 | 1.691797787 | 1.03E-27 | 1.76E-26 |
| AKR1C2 | 1.460350324 | 0.542232425 | -1.429331206 | 1.65E-23 | 1.01E-22 |
| NQO1 | 32.14142063 | 70.31201019 | 1.129337445 | 1.92E-11 | 4.15E-11 |
| MT1G | 434.512964 | 44.58294311 | -3.284835458 | 4.37E-26 | 4.62E-25 |
| FANCD2 | 1.462363459 | 3.497424972 | 1.257991182 | 1.34E-23 | 8.50E-23 |
| HELLS | 0.940892012 | 3.003747802 | 1.674662631 | 3.97E-24 | 2.85E-23 |
| SCD | 19.91025851 | 107.1897444 | 2.428583021 | 2.02E-26 | 2.36E-25 |
| FADS2 | 1.507027653 | 5.556909641 | 1.882576892 | 6.84E-08 | 1.22E-07 |
| CDKN1A | 106.8041535 | 52.90187789 | -1.013576913 | 1.98E-18 | 6.97E-18 |
| ENPP2 | 6.602814255 | 2.641197797 | -1.321888714 | 1.76E-23 | 1.05E-22 |
| CD44 | 13.70798041 | 37.39551923 | 1.44784938 | 8.91E-28 | 1.65E-26 |
| PRDX6 | 198.8273457 | 79.57071185 | -1.321206781 | 7.97E-28 | 1.61E-26 |
| CA9 | 0.64842519 | 31.46183054 | 5.600518665 | 6.92E-25 | 5.91E-24 |
| PROM2 | 10.91036243 | 5.158073344 | -1.080794835 | 2.76E-15 | 8.16E-15 |
| CAV1 | 42.28390084 | 10.55793578 | -2.001780681 | 1.94E-21 | 1.02E-20 |

**Table S3** KEGG analysis of ferroptosis-associated genes**.**

| ID | Description | GeneRatio | BgRatio | pvalue | p.adjust | qvalue | geneID | Count |
| --- | --- | --- | --- | --- | --- | --- | --- | --- |
| hsa05418 | Fluid shear stress and atherosclerosis | 7/54 | 139/8111 | 3.37E-05 | 0.005938263 | 0.005433937 | HMOX1/PRKAA2/IFNG/DUSP1  /VEGFA/NQO1/CAV1 | 7 |
| hsa05230 | Central carbon metabolism in cancer | 5/54 | 70/8111 | 9.44E-05 | 0.007946343 | 0.007271474 | FLT3/SLC1A5/GLS2/SLC7A5  /SLC2A1 | 5 |
| hsa04216 | Ferroptosis | 4/54 | 41/8111 | 0.000148054 | 0.007946343 | 0.007271474 | LPCAT3/HMOX1/SLC7A11/SLC3A2 | 4 |
| hsa05206 | MicroRNAs in cancer | 9/54 | 310/8111 | 0.000180599 | 0.007946343 | 0.007271474 | GLS2/HMOX1/ZEB1/CDKN2A  /ABCC1/DDIT4/VEGFA/CDKN1A  /CD44 | 9 |
| hsa00480 | Glutathione metabolism | 4/54 | 57/8111 | 0.000533764 | 0.018788477 | 0.017192805 | CHAC1/GPX2/RRM2/PRDX6 | 4 |
| hsa04066 | HIF-1 signaling pathway | 5/54 | 109/8111 | 0.000748808 | 0.021965037 | 0.020099586 | HMOX1/IFNG/VEGFA/SLC2A1  /CDKN1A | 5 |
| hsa05211 | Renal cell carcinoma | 4/54 | 69/8111 | 0.001101285 | 0.027689453 | 0.025337836 | EPAS1/VEGFA/SLC2A1/CDKN1A | 4 |
| hsa04115 | p53 signaling pathway | 4/54 | 73/8111 | 0.001359589 | 0.029910964 | 0.027370679 | BID/CDKN2A/RRM2/CDKN1A | 4 |
| hsa00250 | Alanine, aspartate and glutamate metabolism | 3/54 | 37/8111 | 0.001846987 | 0.036118866 | 0.033051355 | GLS2/ASNS/GPT2 | 3 |
| hsa05219 | Bladder cancer | 3/54 | 41/8111 | 0.002486861 | 0.043768747 | 0.040051545 | CDKN2A/VEGFA/CDKN1A | 3 |
| hsa05323 | Rheumatoid arthritis | 4/54 | 93/8111 | 0.003306598 | 0.052134225 | 0.047706558 | IFNG/ATP6V1G2/VEGFA/CXCL2 | 4 |
| hsa04150 | mTOR signaling pathway | 5/54 | 155/8111 | 0.003554606 | 0.052134225 | 0.047706558 | PRKAA2/DDIT4/SLC7A5/SLC3A2  /ATP6V1G2 | 5 |

**Table S4** 693 lncRNAs associated with ferroptosis.

| gene | normal mean | tumor mean | logFC | pValue | fdr |
| --- | --- | --- | --- | --- | --- |
| AC005021.1 | 0.109565422 | 0.27820203 | 1.344340374 | 0.021296228 | 0.027634598 |
| AC135388.1 | 0.003592061 | 0.587199935 | 7.352896157 | 5.22E-14 | 3.15E-13 |
| AC079684.1 | 0.274127202 | 0.93013666 | 1.762597201 | 5.16E-14 | 3.13E-13 |
| FSIP2-AS1 | 0.092835081 | 0.347707294 | 1.90513135 | 1.44E-08 | 4.27E-08 |
| AC005546.1 | 0.127812359 | 0.303883523 | 1.249491108 | 0.011482916 | 0.015443549 |
| AL357054.4 | 1.47962878 | 0.241960316 | -2.612392915 | 1.08E-28 | 2.15E-26 |
| Z68871.1 | 0.231829403 | 0.600108871 | 1.372160705 | 5.77E-10 | 2.06E-09 |
| RAET1E-AS1 | 0.056127867 | 0.375418738 | 2.74171151 | 5.50E-10 | 1.97E-09 |
| SNHG20 | 0.925686151 | 2.332256906 | 1.333131672 | 4.22E-24 | 1.26E-22 |
| AL354726.1 | 0.055697374 | 0.342405926 | 2.620026461 | 0.000622737 | 0.001008452 |
| LINC01355 | 0.379837092 | 0.978337412 | 1.364951317 | 2.37E-10 | 8.91E-10 |
| AP001429.1 | 0.057599894 | 0.855496625 | 3.892624097 | 5.08E-08 | 1.40E-07 |
| MED4-AS1 | 0.125068467 | 0.328766105 | 1.394343476 | 6.85E-08 | 1.85E-07 |
| AOAH-IT1 | 0.052132301 | 0.284040642 | 2.445847937 | 0.000158498 | 0.000277633 |
| AP003555.1 | 0.136099879 | 0.438198111 | 1.686917485 | 3.41E-05 | 6.41E-05 |
| LINC01558 | 0.601877667 | 1.698940238 | 1.497092915 | 2.55E-07 | 6.29E-07 |
| AL121832.1 | 0.053859749 | 0.983776373 | 4.191050988 | 1.51E-24 | 5.09E-23 |
| AC137932.3 | 0.173660253 | 0.463579309 | 1.416548585 | 7.19E-16 | 6.00E-15 |
| ZNF667-AS1 | 1.45658714 | 0.410861924 | -1.825866473 | 5.29E-22 | 1.17E-20 |
| AC007637.1 | 1.117757364 | 0.484524137 | -1.205966609 | 1.13E-22 | 2.76E-21 |
| LRP4-AS1 | 0.177427902 | 0.467070441 | 1.39640724 | 0.000412787 | 0.000685962 |
| SOX9-AS1 | 0.113527393 | 0.235407819 | 1.05212179 | 1.44E-07 | 3.71E-07 |
| TRIM31-AS1 | 1.329897809 | 2.904109523 | 1.126780471 | 7.46E-12 | 3.33E-11 |
| AC016831.1 | 0.099295099 | 0.792288606 | 2.996231636 | 3.52E-26 | 2.15E-24 |
| ZNF346-IT1 | 0.136395311 | 0.342877195 | 1.329897903 | 4.49E-06 | 9.43E-06 |
| AC026356.2 | 0.07494871 | 0.291006473 | 1.957075693 | 1.14E-16 | 1.04E-15 |
| AC144548.1 | 0.11359653 | 0.290316353 | 1.353707079 | 1.23E-09 | 4.20E-09 |
| AC253536.6 | 0.403909213 | 0.858902599 | 1.088463482 | 6.68E-10 | 2.37E-09 |
| GK-IT1 | 0.057190354 | 0.460823601 | 3.010370862 | 7.44E-07 | 1.73E-06 |
| AC021851.1 | 0.139954901 | 0.430373811 | 1.620628278 | 6.61E-16 | 5.58E-15 |
| AC034229.4 | 0.124423181 | 0.319902294 | 1.362376044 | 0.000535782 | 0.000874131 |
| AC048341.2 | 0.527684953 | 1.373947641 | 1.380578277 | 3.55E-13 | 1.89E-12 |
| AC036108.3 | 1.45858049 | 0.170932453 | -3.093066769 | 1.74E-21 | 3.53E-20 |
| AC091588.1 | 0.189149021 | 0.602030552 | 1.670313394 | 0.040259735 | 0.049452167 |
| AC018410.1 | 0.100484674 | 0.337994448 | 1.750024063 | 0.000286123 | 0.000486685 |
| AL158837.1 | 1.116347256 | 0.470445284 | -1.246687024 | 1.18E-18 | 1.41E-17 |
| LINC01705 | 0.006015866 | 1.199352242 | 7.639267359 | 8.90E-25 | 3.44E-23 |
| AP005899.1 | 0.219471939 | 0.587220541 | 1.419865944 | 7.24E-05 | 0.000132483 |
| LINC01871 | 5.312850986 | 2.443378706 | -1.120608761 | 2.55E-13 | 1.40E-12 |
| AC079766.1 | 0.11099464 | 0.222320667 | 1.002152065 | 0.000535935 | 0.000874131 |
| AL442125.2 | 0.175573943 | 0.497865447 | 1.503677141 | 0.000151594 | 0.000266718 |
| AC020663.3 | 0.071669735 | 0.243314738 | 1.763387793 | 3.35E-08 | 9.40E-08 |
| DIAPH2-AS1 | 0.023639538 | 0.264215461 | 3.482441156 | 7.50E-09 | 2.29E-08 |
| AC245014.3 | 0.099389842 | 0.443065026 | 2.156348141 | 0.018514374 | 0.024242832 |
| AC108134.3 | 0.385530362 | 2.434122639 | 2.658485471 | 4.44E-11 | 1.82E-10 |
| AC024361.3 | 0.127146896 | 0.374096548 | 1.556914409 | 5.66E-09 | 1.74E-08 |
| AC026401.3 | 4.056630421 | 10.11840645 | 1.31862832 | 2.21E-26 | 1.53E-24 |
| AC104964.3 | 0.147337896 | 0.342971155 | 1.2189587 | 0.017564753 | 0.023113816 |
| MIR4435-2HG | 0.608500609 | 1.965084535 | 1.691260763 | 3.12E-27 | 2.75E-25 |
| AC006064.3 | 0.098224702 | 0.213547896 | 1.120401898 | 0.000109938 | 0.000196698 |
| AC008456.1 | 0.028204381 | 0.327948632 | 3.539478657 | 1.80E-08 | 5.22E-08 |
| AC211476.2 | 0.052034872 | 0.308287374 | 2.566725116 | 1.80E-09 | 6.01E-09 |
| SNHG22 | 0.165750711 | 0.706309068 | 2.09128456 | 5.45E-09 | 1.69E-08 |
| FSIP2-AS2 | 0.035569337 | 0.224542499 | 2.658282542 | 1.73E-09 | 5.79E-09 |
| AC005224.3 | 0.123936503 | 0.252947906 | 1.029239128 | 0.002661537 | 0.00392552 |
| AL512770.1 | 0.218954636 | 0.502883856 | 1.199593244 | 2.88E-14 | 1.82E-13 |
| AC109322.1 | 0.629438271 | 1.34640337 | 1.096973889 | 1.05E-16 | 9.79E-16 |
| AP001160.4 | 0.167622541 | 0.411366163 | 1.295206959 | 0.000338275 | 0.000570503 |
| MIRLET7BHG | 0.189524537 | 0.527114572 | 1.475731937 | 1.40E-12 | 6.98E-12 |
| LINC01138 | 0.408667946 | 0.867994919 | 1.086757508 | 2.73E-16 | 2.41E-15 |
| AC004943.1 | 0.093839917 | 0.280308539 | 1.578742054 | 1.75E-09 | 5.86E-09 |
| LINC00571 | 0.097483008 | 0.22609488 | 1.213705643 | 2.73E-05 | 5.20E-05 |
| RHPN1-AS1 | 0.196808848 | 0.859500584 | 2.12670354 | 1.90E-21 | 3.81E-20 |
| LASTR | 0.042810569 | 0.358134737 | 3.064463557 | 1.76E-14 | 1.15E-13 |
| AC039056.2 | 0.162838199 | 0.38346286 | 1.235647679 | 4.57E-07 | 1.09E-06 |
| RUSC1-AS1 | 0.835598958 | 2.244116565 | 1.425265017 | 7.87E-17 | 7.48E-16 |
| AC004253.1 | 0.313600865 | 0.799953755 | 1.35098706 | 3.32E-09 | 1.07E-08 |
| LINC00628 | 0.132299944 | 0.321460896 | 1.280830796 | 2.19E-12 | 1.05E-11 |
| CDC42-IT1 | 0.027830313 | 0.234185885 | 3.072925074 | 0.000801146 | 0.001281672 |
| C6orf223 | 0.434727512 | 11.143348 | 4.679927544 | 3.08E-31 | 1.41E-28 |
| AC008781.1 | 0.074106735 | 0.239966648 | 1.695157339 | 0.000933646 | 0.001477264 |
| LINC01655 | 0.00234191 | 0.240178533 | 6.680278007 | 7.40E-12 | 3.32E-11 |
| AF117829.1 | 0.219686178 | 0.612996613 | 1.480434996 | 1.07E-14 | 7.21E-14 |
| AC019080.5 | 0.356784124 | 0.816563302 | 1.194513311 | 4.82E-10 | 1.75E-09 |
| AC087277.2 | 1.714237752 | 0.686081391 | -1.321115574 | 4.62E-15 | 3.36E-14 |
| AC093788.1 | 0.245858421 | 0.672173298 | 1.451005461 | 2.90E-09 | 9.37E-09 |
| HAND2-AS1 | 2.443311209 | 0.09524308 | -4.681079544 | 9.96E-26 | 5.45E-24 |
| AL161729.4 | 0.16122949 | 0.794798715 | 2.301473891 | 3.16E-16 | 2.75E-15 |
| AL162595.1 | 0.347543115 | 0.842585203 | 1.277630617 | 7.74E-15 | 5.37E-14 |
| AC007285.1 | 0.056618041 | 0.297697468 | 2.394513204 | 1.54E-10 | 5.97E-10 |
| AC245100.5 | 0.209692216 | 0.60582914 | 1.530637665 | 2.66E-07 | 6.56E-07 |
| AC007128.1 | 0.015612831 | 0.602328183 | 5.269745711 | 2.20E-27 | 2.33E-25 |
| AC012676.4 | 0.089819857 | 0.22964725 | 1.354313174 | 1.16E-05 | 2.34E-05 |
| AC007342.5 | 0.550381272 | 1.297604044 | 1.237346935 | 2.28E-10 | 8.58E-10 |
| AC062037.2 | 0.377596395 | 0.768953552 | 1.026051466 | 0.004894268 | 0.0069412 |
| LINC00265 | 0.955263876 | 2.212330165 | 1.211595494 | 2.05E-15 | 1.59E-14 |
| AC092301.1 | 0.144349662 | 0.34120942 | 1.241089744 | 9.38E-06 | 1.90E-05 |
| AC058791.1 | 0.223461067 | 1.065780762 | 2.253815296 | 0.001798383 | 0.002716581 |
| CLDN10-AS1 | 0.00469914 | 0.425166935 | 6.499488891 | 1.75E-15 | 1.36E-14 |
| AL591178.1 | 0.500650037 | 1.180451316 | 1.237464151 | 4.99E-06 | 1.04E-05 |
| LINC01811 | 0.004952199 | 0.7398312 | 7.222982981 | 1.49E-24 | 5.09E-23 |
| PSPC1-AS2 | 0.378286508 | 0.913227681 | 1.271495268 | 1.41E-07 | 3.66E-07 |
| AC129507.4 | 0.107012303 | 0.23571354 | 1.139257965 | 0.035017139 | 0.043517776 |
| LINC01311 | 0.241510789 | 0.884718341 | 1.873130591 | 9.11E-23 | 2.26E-21 |
| AC011442.1 | 0.109343932 | 0.277942019 | 1.345910794 | 0.035008901 | 0.043517776 |
| THUMPD3-AS1 | 1.234359084 | 2.580169006 | 1.063703422 | 7.45E-14 | 4.36E-13 |
| AC007216.4 | 0.162513503 | 0.394644095 | 1.27999257 | 8.64E-07 | 2.00E-06 |
| AC025034.1 | 0.175269315 | 0.353997828 | 1.014167065 | 0.034903169 | 0.04344418 |
| DLEU2 | 0.355815111 | 1.156422715 | 1.700469167 | 1.13E-14 | 7.52E-14 |
| LUCAT1 | 0.026724974 | 0.328798665 | 3.620944017 | 8.35E-17 | 7.89E-16 |
| AC018809.1 | 0.21348263 | 0.559101801 | 1.388992304 | 5.58E-08 | 1.52E-07 |
| ALG13-AS1 | 0.347014635 | 0.949707914 | 1.452487367 | 0.02699775 | 0.034248945 |
| AL133330.1 | 0.133273952 | 0.633355117 | 2.248619794 | 2.55E-14 | 1.63E-13 |
| HMGA2-AS1 | 0.017726838 | 0.220477319 | 3.636623092 | 2.12E-14 | 1.36E-13 |
| AL031651.2 | 0.165926425 | 0.359657496 | 1.116080013 | 0.037702087 | 0.046635395 |
| AC133644.1 | 0.899024214 | 0.323764345 | -1.473415859 | 3.70E-18 | 4.14E-17 |
| ANKRD10-IT1 | 4.143185566 | 10.56005409 | 1.349804882 | 2.50E-07 | 6.20E-07 |
| AC087683.2 | 0.08621555 | 0.28700822 | 1.735072058 | 0.027171978 | 0.034442435 |
| AC090116.1 | 0.04259319 | 1.036834004 | 4.605418338 | 2.89E-15 | 2.18E-14 |
| AC007608.2 | 0.001100982 | 0.478223695 | 8.762751231 | 8.49E-10 | 2.95E-09 |
| AC004832.4 | 0.075831262 | 0.282359109 | 1.896666527 | 0.00675621 | 0.009413613 |
| AL162424.1 | 1.052896349 | 0.260702117 | -2.013889217 | 5.97E-21 | 1.06E-19 |
| AL121832.2 | 1.153697586 | 3.485341393 | 1.59503487 | 9.94E-20 | 1.42E-18 |
| AC099850.3 | 3.308565251 | 8.879565315 | 1.424283321 | 6.27E-22 | 1.36E-20 |
| BX470102.1 | 0.958557492 | 5.640757703 | 2.556952099 | 7.74E-25 | 3.15E-23 |
| MIR100HG | 1.781677625 | 0.691407739 | -1.365627664 | 1.01E-09 | 3.48E-09 |
| AC107308.1 | 0.030300628 | 0.253372443 | 3.063840022 | 1.47E-06 | 3.30E-06 |
| LINC01614 | 0.023894378 | 0.965562957 | 5.336627217 | 6.55E-19 | 8.31E-18 |
| AC092718.4 | 0.102581097 | 0.279063715 | 1.443829644 | 5.45E-11 | 2.21E-10 |
| AC023051.1 | 0.035205254 | 0.252987839 | 2.845205365 | 0.025978888 | 0.033141877 |
| AL023803.1 | 0.155112232 | 0.482337774 | 1.636731336 | 6.64E-05 | 0.000122166 |
| CYTOR | 0.976895668 | 2.703282681 | 1.468435986 | 1.20E-22 | 2.88E-21 |
| PPP1R14B-AS1 | 0.74275724 | 3.206927209 | 2.110228939 | 1.71E-26 | 1.23E-24 |
| AC118344.1 | 0.103751489 | 0.237834802 | 1.196827794 | 0.005297899 | 0.007466932 |
| AC018695.4 | 0.214707839 | 0.531992166 | 1.309030136 | 1.72E-09 | 5.79E-09 |
| SNHG16 | 2.163657188 | 5.838850898 | 1.432212535 | 4.42E-30 | 1.40E-27 |
| AC080129.2 | 0.399545528 | 1.2038904 | 1.591272246 | 1.22E-11 | 5.29E-11 |
| SNHG7 | 3.914443565 | 10.45305439 | 1.417045411 | 4.56E-22 | 1.02E-20 |
| AL158063.1 | 0.110067799 | 0.410684505 | 1.89963805 | 5.14E-09 | 1.60E-08 |
| AC116552.1 | 0.065893567 | 0.251340895 | 1.931435904 | 1.60E-09 | 5.41E-09 |
| AC211433.1 | 0.022516255 | 0.253156882 | 3.490992908 | 1.35E-08 | 4.02E-08 |
| MALAT1 | 7.899897489 | 103.5930525 | 3.712949508 | 7.56E-10 | 2.67E-09 |
| AC243967.2 | 0.100281216 | 0.605367928 | 2.593760854 | 2.66E-09 | 8.68E-09 |
| AP002387.1 | 3.130521785 | 6.79617109 | 1.118319031 | 2.89E-10 | 1.08E-09 |
| AL365361.1 | 1.435422617 | 0.342281303 | -2.068221163 | 1.15E-24 | 4.25E-23 |
| C9orf163 | 0.075219975 | 0.304191674 | 2.015792927 | 3.33E-21 | 6.36E-20 |
| AC008105.1 | 0.097042102 | 0.24538364 | 1.33835636 | 1.04E-09 | 3.60E-09 |
| DLGAP1-AS5 | 0.00758556 | 0.348241054 | 5.52068686 | 0.016099015 | 0.021290947 |
| GIHCG | 1.387696449 | 0.614350773 | -1.175557497 | 6.31E-16 | 5.35E-15 |
| AC106886.2 | 0.158976963 | 0.42093596 | 1.404783042 | 6.51E-12 | 2.94E-11 |
| AL445222.1 | 0.187705433 | 0.661808865 | 1.817944207 | 4.24E-15 | 3.10E-14 |
| AC010761.1 | 0.904847649 | 2.380646868 | 1.395606827 | 6.14E-20 | 8.94E-19 |
| AC130371.2 | 1.738157031 | 0.49269618 | -1.818788234 | 1.41E-25 | 7.48E-24 |
| AC092910.3 | 0.266743236 | 0.573022416 | 1.103139885 | 1.53E-12 | 7.54E-12 |
| AP002812.5 | 0.09283852 | 0.223775452 | 1.269256357 | 0.004659821 | 0.006650302 |
| AC018926.2 | 0.165382124 | 0.497851212 | 1.589911335 | 5.10E-10 | 1.84E-09 |
| AL353804.2 | 0.063461046 | 0.473119675 | 2.898261948 | 7.19E-07 | 1.68E-06 |
| MCCC1-AS1 | 0.187928848 | 0.478607092 | 1.348655231 | 8.32E-10 | 2.92E-09 |
| HM13-IT1 | 0.512939507 | 1.574679298 | 1.618197438 | 2.48E-15 | 1.90E-14 |
| SENCR | 0.415817481 | 0.200166253 | -1.05475165 | 5.57E-20 | 8.19E-19 |
| SLC2A1-AS1 | 0.077311218 | 0.242551366 | 1.649540643 | 2.72E-09 | 8.83E-09 |
| LINC02195 | 0.056455594 | 0.519179989 | 3.201046324 | 5.09E-13 | 2.64E-12 |
| TBL1XR1-AS1 | 0.012118046 | 0.254981574 | 4.395164 | 7.13E-06 | 1.46E-05 |
| LINC02163 | 0.002352593 | 1.257104227 | 9.061636968 | 5.32E-26 | 3.13E-24 |
| SAP30-DT | 0.713264029 | 0.334491002 | -1.092468815 | 3.78E-08 | 1.05E-07 |
| AC011511.3 | 0.030986576 | 0.466109616 | 3.910954043 | 5.49E-14 | 3.30E-13 |
| AL021707.6 | 1.50080779 | 3.108340419 | 1.050405291 | 1.82E-09 | 6.04E-09 |
| AL390719.2 | 5.304439155 | 15.08553876 | 1.507894095 | 3.37E-14 | 2.10E-13 |
| AC015922.2 | 8.049240432 | 2.504468075 | -1.684348428 | 2.68E-26 | 1.70E-24 |
| PLAC4 | 0.011640678 | 0.600645697 | 5.689267285 | 6.73E-23 | 1.72E-21 |
| AC092828.1 | 0.022607752 | 0.243374806 | 3.42829037 | 0.007420332 | 0.010266841 |
| AC010331.1 | 0.215368347 | 0.476377931 | 1.145300349 | 4.85E-08 | 1.34E-07 |
| AL133230.1 | 0.046251904 | 0.222539279 | 2.266475321 | 4.44E-11 | 1.82E-10 |
| AC008083.2 | 0.025786385 | 0.230404462 | 3.159487189 | 1.22E-10 | 4.79E-10 |
| MCF2L-AS1 | 2.524051206 | 7.643903884 | 1.598568459 | 1.22E-17 | 1.29E-16 |
| AC113139.1 | 0.155382441 | 0.396871559 | 1.352848698 | 6.72E-05 | 0.000123356 |
| AC004923.4 | 0.199605459 | 0.50645491 | 1.343282656 | 5.81E-14 | 3.48E-13 |
| TRG-AS1 | 0.497213911 | 0.227583619 | -1.127469945 | 1.38E-15 | 1.11E-14 |
| LINC00893 | 0.200089044 | 0.423024751 | 1.080099905 | 4.48E-07 | 1.07E-06 |
| DCUN1D2-AS | 0.143440906 | 0.345104845 | 1.266578224 | 0.000386186 | 0.000647047 |
| MIR23AHG | 6.340059383 | 15.35976999 | 1.276588354 | 7.87E-14 | 4.59E-13 |
| AC127024.3 | 0.031697804 | 0.317198772 | 3.322932369 | 1.69E-05 | 3.32E-05 |
| AC023825.2 | 0.036044958 | 0.27495983 | 2.931351513 | 1.06E-10 | 4.21E-10 |
| AP000786.1 | 0.209150062 | 0.58711351 | 1.48910103 | 0.01265805 | 0.016966491 |
| FP671120.7 | 0.218938056 | 0.67627697 | 1.627091477 | 0.038077175 | 0.046989484 |
| LINC02595 | 0.046525782 | 0.920021478 | 4.30556524 | 8.05E-25 | 3.19E-23 |
| AC103739.1 | 0.10564819 | 0.304099827 | 1.52527695 | 0.024347652 | 0.031211409 |
| DTNB-AS1 | 2.033889796 | 0.475239814 | -2.097513899 | 1.96E-20 | 3.27E-19 |
| AC016394.1 | 0.467477172 | 1.588827982 | 1.764995117 | 8.13E-22 | 1.74E-20 |
| LINC02544 | 0.018235891 | 0.370381293 | 4.344158626 | 2.19E-10 | 8.28E-10 |
| AL133243.2 | 0.428947349 | 1.163621972 | 1.439749962 | 1.18E-05 | 2.36E-05 |
| AC079907.1 | 0.244938757 | 0.571883982 | 1.223301427 | 6.20E-11 | 2.50E-10 |
| AL355472.3 | 0.074037706 | 0.244373171 | 1.722753812 | 0.001463775 | 0.002244455 |
| SERTAD4-AS1 | 3.366935172 | 1.011449302 | -1.735011935 | 2.01E-12 | 9.67E-12 |
| AC015987.1 | 0.077121372 | 0.221567859 | 1.522545999 | 0.000858206 | 0.001367442 |
| LINC01091 | 0.097207661 | 0.291142539 | 1.582583725 | 1.06E-11 | 4.59E-11 |
| AL138999.1 | 0.123334398 | 0.340780747 | 1.466268606 | 0.000303998 | 0.000515983 |
| AC130650.2 | 0.133823345 | 0.326506109 | 1.286780174 | 6.64E-06 | 1.36E-05 |
| AL031985.3 | 0.457495891 | 1.198860043 | 1.389832556 | 1.33E-22 | 3.16E-21 |
| AC007390.1 | 0.174402844 | 0.349352148 | 1.002258441 | 0.000161294 | 0.000281908 |
| LINC01615 | 0.029342934 | 0.307629335 | 3.390108037 | 2.56E-20 | 4.14E-19 |
| AC008114.1 | 0.047575522 | 0.221620382 | 2.219799187 | 1.76E-05 | 3.43E-05 |
| AC015922.3 | 6.085486061 | 2.162166614 | -1.492894799 | 2.45E-24 | 7.78E-23 |
| AC004466.3 | 0.071769339 | 0.26450656 | 1.88186396 | 4.27E-06 | 9.00E-06 |
| SPRY4-AS1 | 0.024803146 | 0.22897551 | 3.206598251 | 3.00E-27 | 2.75E-25 |
| ODF2-AS1 | 0.057130546 | 0.231914266 | 2.02125734 | 9.13E-07 | 2.11E-06 |
| LMO7-AS1 | 0.088540221 | 0.725268162 | 3.034109637 | 5.90E-21 | 1.06E-19 |
| AC006111.2 | 0.127290246 | 0.465992978 | 1.87218634 | 7.36E-19 | 9.05E-18 |
| AC124283.3 | 0.080137329 | 0.335238555 | 2.064641745 | 0.00052141 | 0.000853949 |
| AC098851.1 | 0.261057183 | 0.57509247 | 1.139428095 | 0.012857891 | 0.017190795 |
| AL355312.2 | 0.09692532 | 0.26889996 | 1.472124034 | 4.56E-09 | 1.43E-08 |
| AL360091.1 | 0.070411639 | 0.210386194 | 1.579154209 | 0.003660591 | 0.00530535 |
| LINC00412 | 0.056735069 | 0.264872738 | 2.222986697 | 2.42E-06 | 5.25E-06 |
| MANCR | 0.67023185 | 0.290624013 | -1.205506337 | 1.86E-16 | 1.67E-15 |
| SNHG17 | 2.675779595 | 13.42889233 | 2.32730912 | 2.45E-29 | 5.55E-27 |
| AC092535.5 | 0.729444365 | 2.231045284 | 1.612849945 | 3.15E-15 | 2.35E-14 |
| LINC01857 | 0.974764862 | 0.38790568 | -1.329348344 | 3.74E-08 | 1.05E-07 |
| AL022322.1 | 0.678729861 | 1.611171956 | 1.247201087 | 3.40E-10 | 1.26E-09 |
| CD44-AS1 | 0.151985562 | 1.031483792 | 2.762714967 | 8.26E-18 | 8.85E-17 |
| AC010834.3 | 0.462543648 | 1.111270751 | 1.264548941 | 7.33E-08 | 1.97E-07 |
| AL592301.1 | 0.055263806 | 0.279572375 | 2.338814975 | 4.67E-11 | 1.91E-10 |
| AC078962.1 | 0.083615071 | 0.388741703 | 2.216976978 | 0.004288721 | 0.006159457 |
| AP000692.1 | 0.192442143 | 0.504853964 | 1.39144136 | 1.22E-07 | 3.19E-07 |
| AC020907.4 | 0.268771098 | 1.216726844 | 2.178555403 | 8.91E-19 | 1.08E-17 |
| SLBP-DT | 0.327890193 | 0.950925826 | 1.53612006 | 9.17E-17 | 8.61E-16 |
| CRAT37 | 0.005329719 | 0.254283075 | 5.576232081 | 1.07E-10 | 4.22E-10 |
| AL731569.1 | 0.146326034 | 0.341668067 | 1.223408942 | 1.59E-14 | 1.04E-13 |
| AL590617.2 | 0.557730229 | 1.324815672 | 1.248152272 | 7.07E-19 | 8.77E-18 |
| LINC00216 | 0.092982295 | 0.390674292 | 2.070938387 | 0.017999894 | 0.023608126 |
| AL033527.2 | 0.082463758 | 0.384679941 | 2.221826479 | 1.14E-19 | 1.60E-18 |
| AC005387.2 | 0.123629658 | 0.325898287 | 1.398396893 | 4.83E-10 | 1.75E-09 |
| AP006545.1 | 0.098658402 | 0.279280197 | 1.50119945 | 1.68E-09 | 5.66E-09 |
| AL596223.1 | 0.565813393 | 0.18678074 | -1.598980624 | 5.33E-17 | 5.19E-16 |
| CAPN10-DT | 0.274400633 | 0.759175299 | 1.468149241 | 1.89E-22 | 4.41E-21 |
| AC009121.2 | 0.074256612 | 0.286741435 | 1.949158996 | 1.17E-15 | 9.61E-15 |
| STX18-AS1 | 0.222633761 | 0.448989034 | 1.012007825 | 2.22E-18 | 2.52E-17 |
| AC084125.4 | 0.376703468 | 1.049960755 | 1.478834186 | 4.09E-10 | 1.50E-09 |
| AL008723.2 | 0.024763048 | 0.219589943 | 3.148551193 | 7.02E-07 | 1.64E-06 |
| AC089999.2 | 0.203173329 | 0.425246174 | 1.065587226 | 0.028266431 | 0.035658844 |
| AL358115.1 | 0.150389569 | 0.400941067 | 1.414685685 | 6.19E-08 | 1.68E-07 |
| AC018766.1 | 0.095336193 | 0.383833671 | 2.009385344 | 4.69E-10 | 1.70E-09 |
| LINC02441 | 14.88193309 | 3.181134039 | -2.22594887 | 3.32E-27 | 2.77E-25 |
| AC132192.1 | 0.057306897 | 0.321009412 | 2.485834912 | 1.74E-08 | 5.04E-08 |
| CASC9 | 1.732398479 | 4.791646572 | 1.467750689 | 7.36E-08 | 1.97E-07 |
| AC108727.1 | 0.091945449 | 0.49057703 | 2.415629618 | 0.004457533 | 0.006378814 |
| LINC00996 | 0.927213327 | 0.351615122 | -1.398904184 | 1.62E-17 | 1.66E-16 |
| C5orf66 | 0.113896665 | 0.311155116 | 1.449908461 | 3.83E-24 | 1.19E-22 |
| AC007608.1 | 0.040275785 | 0.443349923 | 3.460461222 | 1.58E-07 | 4.03E-07 |
| FO680682.1 | 0.058780004 | 0.234150119 | 1.994036401 | 0.022323987 | 0.028803388 |
| LINC01126 | 0.120541181 | 0.246389896 | 1.031416991 | 1.39E-05 | 2.75E-05 |
| AL136115.2 | 0.052722619 | 0.601088405 | 3.511083244 | 5.70E-06 | 1.18E-05 |
| MAFG-DT | 0.382623466 | 3.413733056 | 3.157352987 | 3.56E-31 | 1.41E-28 |
| AC012184.3 | 0.227609313 | 0.491212875 | 1.109788785 | 7.04E-11 | 2.83E-10 |
| AC245884.10 | 0.042369508 | 0.330487109 | 2.963495731 | 3.25E-05 | 6.12E-05 |
| AC026356.1 | 0.199546988 | 0.777368734 | 1.961870583 | 1.49E-19 | 2.04E-18 |
| AC013731.1 | 0.119595184 | 0.310288015 | 1.375448682 | 3.44E-11 | 1.42E-10 |
| AL354836.1 | 0.960679562 | 2.887376738 | 1.587632159 | 1.39E-19 | 1.91E-18 |
| AL365436.2 | 0.099744271 | 0.308233649 | 1.627718474 | 0.000123547 | 0.000220056 |
| AL161891.1 | 0.14639392 | 0.560667681 | 1.937290276 | 4.80E-21 | 8.75E-20 |
| LINC01876 | 0.15118705 | 0.609126228 | 2.01040665 | 3.97E-06 | 8.44E-06 |
| AC084125.2 | 0.181895949 | 0.450506768 | 1.308435363 | 4.96E-12 | 2.29E-11 |
| LINC00954 | 0.087471415 | 0.220335567 | 1.332818867 | 0.000925605 | 0.001466074 |
| AL137244.1 | 0.107857397 | 0.45267865 | 2.069362145 | 4.78E-13 | 2.49E-12 |
| AC009065.2 | 7.628663762 | 17.16059119 | 1.169596973 | 1.80E-18 | 2.11E-17 |
| AC129492.1 | 0.17801488 | 0.448688569 | 1.333716589 | 0.001383909 | 0.002131109 |
| AL161785.1 | 0.8275166 | 0.292347706 | -1.501102982 | 4.10E-19 | 5.44E-18 |
| SNHG6 | 23.37954013 | 61.80043149 | 1.402370358 | 7.16E-26 | 4.06E-24 |
| PIK3IP1-DT | 0.210457119 | 0.540665637 | 1.361210354 | 2.35E-12 | 1.12E-11 |
| WASHC5-AS1 | 0.097474861 | 0.348294793 | 1.837206808 | 6.23E-08 | 1.69E-07 |
| LINC01730 | 0.064636576 | 0.522413208 | 3.014768694 | 5.18E-20 | 7.76E-19 |
| EIF1AX-AS1 | 0.031886453 | 0.427884278 | 3.74620513 | 0.017887953 | 0.023480712 |
| AC090739.1 | 0.354519998 | 1.046266551 | 1.561311529 | 2.13E-05 | 4.10E-05 |
| AC018648.1 | 0.102400126 | 0.229805854 | 1.166198063 | 0.001161168 | 0.00181019 |
| LINC01315 | 1.151938306 | 4.395775521 | 1.932054261 | 2.15E-20 | 3.55E-19 |
| MINCR | 1.511719437 | 4.206725135 | 1.476507144 | 2.63E-20 | 4.22E-19 |
| AL355488.1 | 0.703160475 | 1.592771079 | 1.179613046 | 1.38E-08 | 4.07E-08 |
| LINC01569 | 0.557367789 | 1.577371328 | 1.500820789 | 1.05E-21 | 2.19E-20 |
| AC092115.3 | 0.070682935 | 0.294795432 | 2.060280313 | 3.22E-11 | 1.34E-10 |
| FARSA-AS1 | 0.044038278 | 0.224665222 | 2.350946849 | 2.36E-06 | 5.14E-06 |
| AL353796.1 | 0.265075675 | 0.687146997 | 1.374214473 | 6.80E-19 | 8.50E-18 |
| AC093249.2 | 0.186226132 | 0.401386254 | 1.107935679 | 4.34E-08 | 1.20E-07 |
| AC105429.1 | 0.039124415 | 0.254355156 | 2.700703234 | 9.25E-21 | 1.61E-19 |
| AL136988.2 | 0.07817592 | 0.268067216 | 1.777798597 | 0.000460047 | 0.000758146 |
| AC022034.1 | 1.511664034 | 0.305285425 | -2.307906916 | 1.07E-21 | 2.20E-20 |
| AL035071.2 | 0.079383496 | 0.468832929 | 2.5621629 | 1.67E-06 | 3.71E-06 |
| AL078587.1 | 0.096404655 | 0.691682909 | 2.842936101 | 2.78E-15 | 2.11E-14 |
| AC145423.2 | 0.118996018 | 0.390896289 | 1.715872589 | 1.22E-11 | 5.29E-11 |
| AP000487.1 | 0.122162131 | 0.311388932 | 1.349920527 | 7.51E-21 | 1.32E-19 |
| AC012213.3 | 0.050344181 | 0.249912937 | 2.311528658 | 2.37E-12 | 1.12E-11 |
| AL513123.1 | 0.023671311 | 0.352324902 | 3.89569493 | 1.37E-17 | 1.43E-16 |
| LINC-PINT | 0.524523833 | 1.552530728 | 1.565541591 | 4.40E-14 | 2.69E-13 |
| AC015849.3 | 0.915461102 | 2.040226802 | 1.156159047 | 4.49E-07 | 1.08E-06 |
| UNC5B-AS1 | 0.177326908 | 0.713529835 | 2.008562288 | 0.005185734 | 0.007321851 |
| AC141930.1 | 0.044844068 | 0.262895251 | 2.551499006 | 0.001586871 | 0.002423835 |
| SLFNL1-AS1 | 0.108024897 | 0.220994366 | 1.032645741 | 9.18E-08 | 2.43E-07 |
| AC092168.2 | 0.038124373 | 0.637255002 | 4.063085295 | 8.20E-09 | 2.49E-08 |
| PEF1-AS1 | 0.079761062 | 0.231743039 | 1.538769484 | 9.12E-08 | 2.42E-07 |
| AC012065.2 | 0.201252266 | 0.478443048 | 1.249342173 | 0.001342646 | 0.002072743 |
| AC232271.1 | 0.378553239 | 0.784354713 | 1.051010028 | 7.74E-10 | 2.72E-09 |
| LENG8-AS1 | 0.968372901 | 2.40155206 | 1.310332471 | 1.75E-19 | 2.37E-18 |
| C2-AS1 | 0.024689084 | 0.296239403 | 3.584818312 | 1.09E-19 | 1.55E-18 |
| ZKSCAN2-DT | 0.406085158 | 1.008892297 | 1.312917965 | 4.69E-13 | 2.45E-12 |
| AC007622.2 | 0.155369213 | 0.322282741 | 1.052626279 | 0.003723289 | 0.005391295 |
| ARHGEF2-AS2 | 0.161480918 | 0.341189393 | 1.079209105 | 1.24E-08 | 3.71E-08 |
| AL031717.1 | 0.171032663 | 0.406302962 | 1.248284015 | 5.88E-06 | 1.22E-05 |
| AL662797.1 | 0.21847773 | 0.469280177 | 1.10296329 | 2.37E-10 | 8.91E-10 |
| AL121845.4 | 0.165122939 | 0.438347881 | 1.408535722 | 0.000995071 | 0.001569758 |
| AC073487.1 | 0.202132041 | 0.5741304 | 1.506080419 | 2.02E-07 | 5.08E-07 |
| MHENCR | 2.231940233 | 8.980767826 | 2.008540401 | 5.25E-25 | 2.25E-23 |
| STPG3-AS1 | 0.096878696 | 0.266969762 | 1.462424993 | 1.16E-06 | 2.62E-06 |
| AC092171.3 | 0.395568383 | 1.078957108 | 1.447638491 | 4.01E-21 | 7.58E-20 |
| ARHGEF38-IT1 | 0.10359365 | 0.630886979 | 2.606446001 | 3.21E-10 | 1.19E-09 |
| AC010463.3 | 0.183432827 | 0.446655019 | 1.283909129 | 5.36E-10 | 1.93E-09 |
| AC137630.3 | 0.243950995 | 0.649576916 | 1.412908993 | 0.000498633 | 0.000818336 |
| AC090527.3 | 0.078260342 | 0.215790898 | 1.463280698 | 5.31E-07 | 1.26E-06 |
| AC011498.6 | 0.180469797 | 0.48436141 | 1.424326514 | 1.06E-09 | 3.65E-09 |
| AP001107.5 | 1.283032903 | 0.165194617 | -2.957319588 | 4.33E-21 | 8.09E-20 |
| AC127024.2 | 0.03257879 | 0.242626144 | 2.896730108 | 2.03E-10 | 7.76E-10 |
| TMEM147-AS1 | 0.609681196 | 2.356156476 | 1.950308399 | 8.28E-27 | 6.26E-25 |
| AL512652.1 | 0.066898503 | 0.370504928 | 2.469446906 | 4.31E-14 | 2.64E-13 |
| PAN3-AS1 | 0.503515244 | 1.084529051 | 1.106961338 | 1.74E-10 | 6.72E-10 |
| MIR34AHG | 0.055596902 | 0.225325772 | 2.018935944 | 5.49E-09 | 1.70E-08 |
| AC004076.2 | 0.094128485 | 0.249551575 | 1.406634733 | 2.38E-12 | 1.13E-11 |
| AC103591.3 | 0.389596023 | 1.550308548 | 1.992504517 | 4.28E-07 | 1.03E-06 |
| AC010530.1 | 0.101468529 | 0.209989611 | 1.049285616 | 0.002684678 | 0.003952304 |
| LINC00894 | 0.119045413 | 0.484582621 | 2.025230634 | 6.09E-15 | 4.31E-14 |
| AP001458.1 | 0.157333563 | 0.459569948 | 1.546457999 | 0.021000323 | 0.027272923 |
| AL137782.1 | 0.258770953 | 0.729564172 | 1.495359202 | 4.26E-14 | 2.62E-13 |
| AC104785.1 | 0.153175903 | 0.465971507 | 1.605052381 | 6.60E-15 | 4.63E-14 |
| AC124067.4 | 3.571447821 | 10.26606254 | 1.523302006 | 1.20E-14 | 7.94E-14 |
| WNT5A-AS1 | 0.347066371 | 0.718613634 | 1.050004726 | 0.002002281 | 0.002997755 |
| AL117379.1 | 0.45633239 | 1.586911819 | 1.798064998 | 8.73E-15 | 5.95E-14 |
| C10orf55 | 0.063105877 | 0.259406385 | 2.039367723 | 3.01E-20 | 4.73E-19 |
| DLGAP4-AS1 | 0.072252985 | 0.271359604 | 1.909076871 | 1.04E-14 | 7.00E-14 |
| AP001160.1 | 0.195439054 | 0.763602414 | 1.966102875 | 1.65E-23 | 4.50E-22 |
| UCKL1-AS1 | 0.137940678 | 0.492630372 | 1.83645761 | 2.99E-14 | 1.89E-13 |
| AC012313.5 | 0.430740743 | 0.21111314 | -1.028803412 | 2.78E-20 | 4.41E-19 |
| AC004223.2 | 0.027321226 | 0.281497066 | 3.365025757 | 0.002241386 | 0.003339981 |
| AC026333.4 | 0.220658599 | 0.50622004 | 1.197948652 | 2.28E-08 | 6.49E-08 |
| AC005479.2 | 0.085799846 | 0.266474048 | 1.634948068 | 1.90E-07 | 4.79E-07 |
| AC087588.1 | 0.477671762 | 0.986339523 | 1.046064752 | 3.68E-05 | 6.90E-05 |
| AC092436.2 | 0.032897612 | 0.260119904 | 2.983122042 | 0.005951155 | 0.008335819 |
| AC008543.3 | 0.093348985 | 0.263750542 | 1.498467823 | 0.039983492 | 0.049150892 |
| AC108463.2 | 0.077048348 | 0.294995811 | 1.936858546 | 8.40E-10 | 2.93E-09 |
| AC090578.2 | 0.038808843 | 0.216308403 | 2.47863237 | 0.000673918 | 0.001084694 |
| SUGT1-DT | 0.373184351 | 1.46067651 | 1.968676311 | 3.59E-20 | 5.58E-19 |
| AL162724.2 | 0.224468979 | 0.651748356 | 1.537798957 | 1.74E-05 | 3.41E-05 |
| AC105137.2 | 0.09050565 | 0.292089342 | 1.690329956 | 3.57E-16 | 3.10E-15 |
| VPS9D1-AS1 | 1.22955509 | 8.249429807 | 2.746158029 | 2.41E-28 | 3.82E-26 |
| AP001469.2 | 0.21752233 | 0.484393059 | 1.155014684 | 6.95E-08 | 1.88E-07 |
| AC008115.3 | 0.725566821 | 1.841205119 | 1.343469968 | 4.21E-12 | 1.96E-11 |
| USP30-AS1 | 4.710591509 | 2.015137328 | -1.225030071 | 9.41E-12 | 4.15E-11 |
| AC004000.1 | 0.114317526 | 0.330536693 | 1.531763835 | 0.010212967 | 0.013829333 |
| AC010542.5 | 1.01511928 | 2.507395379 | 1.304540247 | 1.22E-15 | 9.90E-15 |
| RNF139-AS1 | 0.123823018 | 0.359204928 | 1.536527615 | 5.53E-18 | 6.05E-17 |
| SCARNA9 | 0.459677146 | 5.675877871 | 3.626150702 | 2.72E-14 | 1.74E-13 |
| AC083900.1 | 1.136841855 | 0.399952747 | -1.50713011 | 1.79E-18 | 2.11E-17 |
| PRDX6-AS1 | 0.667046894 | 0.246579959 | -1.435732639 | 6.92E-25 | 2.89E-23 |
| AC010973.2 | 0.255607489 | 0.889219321 | 1.798609189 | 2.24E-21 | 4.44E-20 |
| C1orf195 | 0.048903707 | 0.4166848 | 3.090940739 | 0.015667705 | 0.020737822 |
| AC010320.3 | 0.074956754 | 0.263063484 | 1.811280615 | 6.79E-05 | 0.000124553 |
| AL512506.1 | 0.065623482 | 0.395710789 | 2.592162342 | 5.57E-08 | 1.52E-07 |
| GS1-124K5.4 | 0.90301308 | 2.378539563 | 1.397257233 | 7.73E-18 | 8.35E-17 |
| AC007406.3 | 0.047977368 | 0.302960441 | 2.658703516 | 2.19E-22 | 5.04E-21 |
| AC040169.3 | 0.186651241 | 0.465295739 | 1.317802877 | 4.05E-09 | 1.28E-08 |
| AC104365.1 | 0.007344305 | 0.39748084 | 5.758115498 | 3.28E-09 | 1.05E-08 |
| LINC00622 | 0.123773148 | 0.296629028 | 1.260961427 | 0.000620451 | 0.001005777 |
| AC243960.1 | 0.922128582 | 0.345313092 | -1.417062901 | 2.15E-18 | 2.46E-17 |
| AL035071.1 | 1.881772161 | 3.850168155 | 1.032829495 | 2.17E-10 | 8.24E-10 |
| AC004837.2 | 0.124478286 | 0.691543287 | 2.473925462 | 1.35E-11 | 5.79E-11 |
| AC010655.2 | 0.063364922 | 0.267668987 | 2.078693681 | 3.34E-13 | 1.79E-12 |
| AC016831.4 | 0.056100496 | 0.776494284 | 3.790889863 | 5.36E-07 | 1.27E-06 |
| AL359513.1 | 0.474209396 | 1.163898851 | 1.295369532 | 1.30E-11 | 5.59E-11 |
| AL031673.1 | 0.402605374 | 1.240602803 | 1.623602953 | 1.06E-11 | 4.59E-11 |
| AL158825.2 | 0.157776329 | 0.369972499 | 1.22953726 | 0.001313951 | 0.002030419 |
| AL138689.1 | 0.303488956 | 1.039017856 | 1.775504524 | 1.79E-06 | 3.94E-06 |
| AL031600.1 | 0.248489084 | 0.884483887 | 1.831653382 | 5.88E-15 | 4.18E-14 |
| AL049780.1 | 0.143888094 | 0.313294574 | 1.122572567 | 1.52E-05 | 3.01E-05 |
| LINC00174 | 0.513962441 | 1.230232632 | 1.259196311 | 3.25E-15 | 2.41E-14 |
| LINC02615 | 0.148833712 | 0.419126278 | 1.493683636 | 4.05E-14 | 2.50E-13 |
| AC069257.1 | 0.051614142 | 0.219411764 | 2.08780255 | 0.030221605 | 0.038004506 |
| AC005180.2 | 1.780458691 | 0.249836225 | -2.833194386 | 4.68E-25 | 2.06E-23 |
| AC123023.1 | 0.028541777 | 1.992815925 | 6.125589484 | 2.42E-25 | 1.13E-23 |
| ALMS1-IT1 | 0.104564894 | 0.375044299 | 1.84266244 | 1.49E-14 | 9.77E-14 |
| AL513327.1 | 0.258946296 | 0.558680043 | 1.109369361 | 7.69E-06 | 1.56E-05 |
| MYB-AS1 | 0.094162696 | 0.371426234 | 1.979848187 | 0.000386179 | 0.000647047 |
| AL161729.2 | 0.042074649 | 0.28560419 | 2.762993993 | 7.72E-05 | 0.000140413 |
| AC068790.4 | 0.119080082 | 0.37677132 | 1.661757025 | 0.026537236 | 0.033727425 |
| SNHG3 | 3.639029712 | 10.79415697 | 1.568624837 | 6.63E-23 | 1.72E-21 |
| ABALON | 0.185062385 | 0.774669887 | 2.065569971 | 1.37E-27 | 1.55E-25 |
| AC009318.4 | 0.138831014 | 0.387820345 | 1.482058595 | 0.014668885 | 0.019513429 |
| AC008610.1 | 0.756797177 | 1.821697343 | 1.267304678 | 5.41E-12 | 2.48E-11 |
| NEAT1 | 10.39995809 | 31.26259657 | 1.587859895 | 0.003999438 | 0.005759626 |
| Z84485.1 | 0.129281417 | 0.400714049 | 1.632058181 | 3.77E-14 | 2.34E-13 |
| AC068790.3 | 0.145876738 | 0.436041939 | 1.579717058 | 0.000113875 | 0.000203514 |
| AC022973.5 | 0.091847176 | 0.24792072 | 1.432571583 | 2.76E-05 | 5.23E-05 |
| AP001893.1 | 0.189460267 | 0.400500986 | 1.07991047 | 0.003294432 | 0.004787787 |
| AP002336.2 | 0.163126226 | 0.523921456 | 1.683361801 | 1.57E-12 | 7.73E-12 |
| FENDRR | 6.462926513 | 1.752658692 | -1.88264251 | 1.02E-24 | 3.86E-23 |
| KANSL1L-AS1 | 0.108703166 | 0.363232447 | 1.740499123 | 2.04E-08 | 5.86E-08 |
| LINC01943 | 0.160807352 | 0.414177378 | 1.364915385 | 1.71E-12 | 8.33E-12 |
| ZMIZ1-AS1 | 0.105222512 | 0.22531039 | 1.098470448 | 9.71E-09 | 2.94E-08 |
| MNX1-AS1 | 1.072289085 | 4.404695411 | 2.038348355 | 1.82E-25 | 9.04E-24 |
| GABPB1-AS1 | 0.515662885 | 1.181625084 | 1.196272242 | 2.42E-08 | 6.86E-08 |
| MBNL1-AS1 | 3.114210782 | 0.509039061 | -2.613018324 | 3.58E-25 | 1.63E-23 |
| AL136115.1 | 0.049704783 | 0.390351195 | 2.973316094 | 0.000481113 | 0.000790399 |
| MIR181A2HG | 0.154777567 | 0.602623012 | 1.961059379 | 4.94E-09 | 1.54E-08 |
| AL391095.3 | 0.070079101 | 0.254471972 | 1.860450589 | 1.21E-10 | 4.75E-10 |
| KCNQ1OT1 | 0.021709144 | 0.22935628 | 3.401215669 | 5.55E-20 | 8.19E-19 |
| HIF1A-AS3 | 0.184594005 | 1.483890347 | 3.006956884 | 0.010861559 | 0.014658692 |
| AC024060.2 | 1.72268906 | 3.643128414 | 1.080515525 | 4.84E-14 | 2.94E-13 |
| LINC00513 | 0.844496036 | 2.218381419 | 1.393344881 | 1.74E-07 | 4.39E-07 |
| AL355075.2 | 0.396538384 | 0.832317872 | 1.069674094 | 6.37E-06 | 1.31E-05 |
| PABPC4-AS1 | 0.159158329 | 0.500740618 | 1.653600833 | 0.000350316 | 0.000590182 |
| YEATS2-AS1 | 0.108889201 | 0.296181147 | 1.443618924 | 2.77E-14 | 1.76E-13 |
| AP003071.4 | 1.578167862 | 0.345494148 | -2.191517488 | 1.66E-15 | 1.31E-14 |
| AC027373.1 | 0.113447815 | 0.281704657 | 1.312154589 | 5.42E-10 | 1.95E-09 |
| NDUFB2-AS1 | 0.342471828 | 0.704563301 | 1.040744015 | 4.42E-21 | 8.15E-20 |
| AL928654.2 | 1.084825329 | 2.514359551 | 1.2127282 | 9.50E-10 | 3.30E-09 |
| LINC00578 | 1.3799423 | 0.58832597 | -1.229920317 | 3.68E-06 | 7.88E-06 |
| PTOV1-AS2 | 1.214840333 | 2.783697905 | 1.196235942 | 6.23E-15 | 4.39E-14 |
| AL117382.1 | 2.699254798 | 11.79967835 | 2.128114461 | 1.58E-13 | 8.94E-13 |
| AC005632.3 | 0.181361391 | 0.416196412 | 1.198397168 | 0.019621582 | 0.025608101 |
| B4GALT1-AS1 | 3.548330622 | 1.170535701 | -1.599971504 | 5.82E-27 | 4.62E-25 |
| AC010536.2 | 0.228770214 | 0.779799375 | 1.769203775 | 0.000706789 | 0.00113415 |
| C2orf49-DT | 0.282455498 | 0.624194874 | 1.143972926 | 1.62E-13 | 9.16E-13 |
| AL161452.1 | 0.111582009 | 0.329099623 | 1.56041995 | 3.93E-15 | 2.90E-14 |
| AC118754.1 | 0.03773216 | 0.321171815 | 3.089478706 | 6.22E-12 | 2.82E-11 |
| NCBP2-AS1 | 0.222504648 | 0.552651986 | 1.312535807 | 4.26E-08 | 1.18E-07 |
| AC084117.1 | 0.234070757 | 0.686363637 | 1.552028415 | 2.51E-06 | 5.43E-06 |
| ZNF775-AS1 | 0.128721815 | 0.411592215 | 1.676959118 | 2.48E-08 | 7.02E-08 |
| AC073333.1 | 0.124846027 | 0.479803886 | 1.942294927 | 8.51E-15 | 5.82E-14 |
| AC005062.1 | 0.095261391 | 0.257645449 | 1.435423584 | 1.23E-07 | 3.20E-07 |
| AC027277.2 | 0.049210629 | 0.251560548 | 2.353863818 | 0.004728648 | 0.006736414 |
| AL031716.1 | 0.317575979 | 0.92643965 | 1.544595206 | 7.40E-13 | 3.76E-12 |
| AL034550.1 | 0.351562326 | 0.810878919 | 1.205706031 | 1.56E-06 | 3.47E-06 |
| AL035461.2 | 0.91432805 | 2.29301062 | 1.326459251 | 2.68E-13 | 1.46E-12 |
| AL031667.3 | 0.086783722 | 0.344934646 | 1.990826667 | 1.75E-09 | 5.86E-09 |
| AL138963.1 | 0.092059915 | 0.787578824 | 3.096779305 | 0.000126061 | 0.000224029 |
| AL591895.1 | 8.961060508 | 18.5828182 | 1.052227927 | 5.77E-09 | 1.77E-08 |
| AC000123.1 | 0.914808498 | 1.874578055 | 1.035024225 | 4.49E-08 | 1.24E-07 |
| AL021578.1 | 0.152166677 | 0.814964838 | 2.421085353 | 1.23E-14 | 8.11E-14 |
| AC007938.3 | 0.267556116 | 0.753827664 | 1.494393231 | 4.37E-13 | 2.30E-12 |
| AC011676.1 | 0.090081721 | 0.618323303 | 2.779055078 | 4.42E-20 | 6.67E-19 |
| C3orf35 | 0.105375578 | 0.253491514 | 1.266396902 | 8.68E-12 | 3.85E-11 |
| AC244093.4 | 0.051012828 | 0.233140137 | 2.192265401 | 0.014519622 | 0.019331074 |
| ACBD3-AS1 | 0.30628794 | 0.841320814 | 1.457767474 | 1.37E-07 | 3.57E-07 |
| AC012615.4 | 0.109812783 | 0.332300877 | 1.597444102 | 1.25E-06 | 2.83E-06 |
| ZFAND2A-DT | 1.020855074 | 2.091395313 | 1.034687715 | 2.41E-13 | 1.33E-12 |
| AL157838.1 | 0.242292784 | 0.556319366 | 1.19916189 | 1.57E-07 | 4.01E-07 |
| FTX | 0.207824957 | 1.005366668 | 2.274280946 | 2.14E-06 | 4.68E-06 |
| A2M-AS1 | 0.674519319 | 0.221945749 | -1.603652689 | 1.16E-16 | 1.05E-15 |
| AC078778.1 | 0.093142981 | 0.265139386 | 1.50923203 | 0.002594691 | 0.003830488 |
| AC026368.1 | 0.078444293 | 0.605954868 | 2.94946994 | 2.08E-18 | 2.39E-17 |
| LINC02604 | 0.760859998 | 2.429794251 | 1.675131234 | 4.97E-19 | 6.47E-18 |
| AC092338.1 | 0.124264316 | 0.521489347 | 2.069225709 | 0.001874817 | 0.00281799 |
| RHOA-IT1 | 0.218576124 | 0.451516151 | 1.046641774 | 0.000178976 | 0.000310156 |
| AC141002.1 | 0.251364831 | 0.53641086 | 1.093555633 | 2.73E-05 | 5.19E-05 |
| AC010976.1 | 0.110396479 | 0.293845786 | 1.412365048 | 2.09E-08 | 5.98E-08 |
| AL354993.2 | 0.181214579 | 0.617514664 | 1.768774371 | 0.000409859 | 0.00068181 |
| STK24-AS1 | 0.15172813 | 0.307531606 | 1.019246107 | 1.06E-09 | 3.66E-09 |
| AC002128.2 | 0.279518467 | 0.575128939 | 1.040941828 | 0.000575516 | 0.000935803 |
| AC138932.4 | 0.217574343 | 0.511599424 | 1.233506197 | 0.000656969 | 0.00106064 |
| AC104083.1 | 5.464413672 | 2.590649831 | -1.076752679 | 6.55E-07 | 1.54E-06 |
| AC007639.1 | 0.057339655 | 0.318738807 | 2.474769544 | 1.46E-13 | 8.31E-13 |
| MAL2-AS1 | 0.072522574 | 0.355574941 | 2.293651616 | 0.000149378 | 0.000263111 |
| SNHG4 | 0.884263138 | 3.532967728 | 1.998332918 | 4.85E-24 | 1.43E-22 |
| MIR22HG | 11.79514476 | 3.779352203 | -1.641982247 | 1.20E-27 | 1.46E-25 |
| AC012173.1 | 0.09359923 | 0.25666971 | 1.455344479 | 4.73E-08 | 1.31E-07 |
| AL353747.3 | 0.052443805 | 0.356066689 | 2.7633032 | 1.10E-07 | 2.88E-07 |
| C5orf66-AS1 | 0.853635243 | 0.332259065 | -1.36131118 | 9.67E-17 | 9.03E-16 |
| AC092718.3 | 2.881180875 | 7.811904513 | 1.439014082 | 3.92E-24 | 1.20E-22 |
| ZNF337-AS1 | 0.154613037 | 0.373488507 | 1.272401882 | 3.93E-13 | 2.08E-12 |
| AC104564.4 | 0.016169556 | 0.238673169 | 3.883684394 | 6.00E-12 | 2.73E-11 |
| SLC16A1-AS1 | 0.114006328 | 0.453794902 | 1.992926497 | 1.04E-21 | 2.19E-20 |
| AC009404.1 | 0.17588816 | 0.556265835 | 1.661116131 | 7.61E-23 | 1.92E-21 |
| BNC2-AS1 | 0.414716881 | 0.186148466 | -1.155673048 | 6.76E-14 | 3.98E-13 |
| AC011468.1 | 0.614518499 | 1.234620987 | 1.006539875 | 7.24E-08 | 1.95E-07 |
| AP005329.1 | 0.227298568 | 0.494969052 | 1.122749726 | 8.82E-07 | 2.04E-06 |
| ARAP1-AS2 | 0.064077091 | 0.23042151 | 1.846394845 | 1.30E-05 | 2.58E-05 |
| AC027808.2 | 0.028363634 | 0.229412522 | 3.01582987 | 5.96E-06 | 1.23E-05 |
| AL031714.1 | 0.471680697 | 0.986122309 | 1.063956036 | 3.11E-12 | 1.47E-11 |
| AC114763.1 | 0.126424241 | 0.309292731 | 1.29069981 | 1.12E-10 | 4.43E-10 |
| AC005618.1 | 0.143105481 | 0.306037715 | 1.096630532 | 0.000178486 | 0.00030991 |
| AL110115.1 | 0.042153628 | 0.350195584 | 3.054432186 | 2.14E-06 | 4.68E-06 |
| AC068790.2 | 0.114864726 | 0.338381568 | 1.558715162 | 0.012159486 | 0.016312007 |
| AC092143.3 | 0.068361334 | 0.263964984 | 1.949094108 | 2.42E-11 | 1.02E-10 |
| AC000061.1 | 0.155559986 | 0.80576525 | 2.372888582 | 4.58E-07 | 1.10E-06 |
| AC087222.1 | 0.116333396 | 0.553565289 | 2.250488171 | 5.92E-10 | 2.11E-09 |
| AC068790.6 | 0.100435492 | 0.330111759 | 1.71668535 | 0.024073948 | 0.030885493 |
| AC048344.4 | 0.08292745 | 0.506187025 | 2.609748886 | 7.41E-19 | 9.05E-18 |
| AC007773.1 | 0.165026732 | 0.656124922 | 1.991270784 | 3.23E-19 | 4.34E-18 |
| AL513218.1 | 0.160685145 | 0.401083412 | 1.319665742 | 1.55E-08 | 4.57E-08 |
| ADD3-AS1 | 0.108661626 | 0.328824772 | 1.597476443 | 3.36E-12 | 1.58E-11 |
| AC112496.1 | 0.184694958 | 0.835994191 | 2.178348432 | 4.54E-06 | 9.53E-06 |
| AC244093.5 | 0.058720554 | 0.216877089 | 1.884940162 | 1.76E-05 | 3.43E-05 |
| AC004832.5 | 0.093293093 | 0.385568956 | 2.047146714 | 5.22E-07 | 1.24E-06 |
| PELATON | 0.619763454 | 1.763877861 | 1.508961076 | 1.06E-16 | 9.79E-16 |
| AL161729.3 | 0.086095545 | 0.239832596 | 1.478017263 | 3.74E-06 | 8.01E-06 |
| AC020900.1 | 0.048083028 | 0.285502166 | 2.569902021 | 0.001906066 | 0.002861803 |
| AL008718.3 | 0.092990857 | 0.266981542 | 1.521579221 | 0.007584274 | 0.010484532 |
| AL162724.1 | 0.042662526 | 0.244592274 | 2.51933755 | 0.035989452 | 0.044621297 |
| KLF7-IT1 | 0.072442517 | 0.353924145 | 2.288531604 | 0.009839884 | 0.013335522 |
| KLHL7-DT | 0.099095488 | 0.223244268 | 1.171731852 | 0.000392322 | 0.000656074 |
| GK-AS1 | 0.237512254 | 0.92742516 | 1.965228916 | 1.56E-05 | 3.08E-05 |
| AL031670.1 | 0.356467051 | 0.749531993 | 1.072221327 | 0.00093991 | 0.001485694 |
| AF001548.1 | 2.005814066 | 0.184168845 | -3.445086942 | 1.94E-18 | 2.26E-17 |
| HECW2-AS1 | 0.481148709 | 0.220655516 | -1.124687044 | 3.72E-13 | 1.97E-12 |
| LINC01050 | 0.004615516 | 0.278152061 | 5.913238057 | 2.12E-16 | 1.89E-15 |
| SNHG11 | 1.993044572 | 5.495605716 | 1.463304527 | 1.43E-24 | 5.05E-23 |
| AC016405.1 | 0.024890606 | 0.219325029 | 3.139397187 | 0.03174359 | 0.039729556 |
| MIR222HG | 0.670745919 | 1.513742931 | 1.174281946 | 4.46E-09 | 1.40E-08 |
| STAG3L5P-PVRIG2P-PILRB | 0.271291653 | 0.697149136 | 1.361622657 | 2.63E-15 | 2.01E-14 |
| AC083880.1 | 0.293477296 | 0.819384933 | 1.481292468 | 1.07E-16 | 9.86E-16 |
| MAP3K5-AS1 | 0.162793687 | 0.477896692 | 1.553654026 | 0.000600081 | 0.000973751 |
| LINC01186 | 0.113554802 | 0.583041207 | 2.360209135 | 9.71E-21 | 1.67E-19 |
| UBE2Q1-AS1 | 0.14737039 | 0.422008607 | 1.517825737 | 2.94E-10 | 1.09E-09 |
| AL031710.2 | 0.063365636 | 0.358112433 | 2.498640032 | 4.18E-20 | 6.38E-19 |
| MIR31HG | 0.027738323 | 0.379179682 | 3.772929175 | 7.20E-12 | 3.24E-11 |
| LINC02100 | 0.108071268 | 0.430295499 | 1.993344729 | 9.51E-08 | 2.52E-07 |
| AL121583.1 | 0.206472397 | 0.477046916 | 1.20818223 | 2.08E-07 | 5.20E-07 |
| AC026470.2 | 0.076277008 | 0.419628653 | 2.459793041 | 0.020865801 | 0.027120415 |
| HS1BP3-IT1 | 0.148294493 | 0.351123457 | 1.24351336 | 4.16E-05 | 7.77E-05 |
| AC008870.2 | 0.270438322 | 0.662489055 | 1.292597017 | 9.79E-13 | 4.92E-12 |
| LINC00390 | 0.510738706 | 0.192268324 | -1.409464298 | 1.77E-14 | 1.15E-13 |
| SCAT2 | 0.185477216 | 0.812928443 | 2.131886388 | 3.07E-17 | 3.09E-16 |
| TMEM75 | 0.007270966 | 0.343488217 | 5.561969729 | 1.08E-13 | 6.27E-13 |
| AC083805.2 | 0.091529477 | 0.344875017 | 1.913765286 | 6.10E-05 | 0.000112536 |
| CASC15 | 0.113192635 | 0.375264678 | 1.729128411 | 2.51E-11 | 1.06E-10 |
| CHN2-AS1 | 0.031719375 | 0.742611819 | 4.549172009 | 6.03E-17 | 5.80E-16 |
| LINC02257 | 0.0042481 | 0.314437217 | 6.209810601 | 6.77E-19 | 8.50E-18 |
| AC008760.2 | 0.24881927 | 0.615376845 | 1.306371941 | 0.002738443 | 0.004020268 |
| AC008649.2 | 0.05958885 | 0.858282507 | 3.848338289 | 0.000478442 | 0.000787642 |
| LINC01012 | 0.127435558 | 0.324490624 | 1.348408907 | 1.25E-19 | 1.73E-18 |
| LINC02747 | 13.51618112 | 6.015683746 | -1.167886959 | 7.54E-17 | 7.21E-16 |
| AL590723.1 | 0.211983897 | 0.582475137 | 1.458241792 | 0.001477874 | 0.002263886 |
| AL365356.1 | 0.014478476 | 0.232033675 | 4.002352558 | 0.008896629 | 0.012161025 |
| LINC01473 | 0.199212943 | 0.723085745 | 1.85985535 | 5.12E-12 | 2.35E-11 |
| AC107081.1 | 0.110894488 | 0.423419751 | 1.932900909 | 4.37E-18 | 4.82E-17 |
| AC027801.1 | 0.158639981 | 0.367636444 | 1.212523378 | 1.70E-07 | 4.31E-07 |
| AC007014.2 | 0.060311664 | 0.295211688 | 2.291240887 | 5.17E-09 | 1.60E-08 |
| AP000873.1 | 0.265059308 | 0.532486911 | 1.006430858 | 7.75E-08 | 2.07E-07 |
| AC245884.8 | 0.337676507 | 1.176872394 | 1.801244183 | 3.24E-17 | 3.23E-16 |
| AL136084.2 | 1.486435758 | 0.697521906 | -1.091546681 | 4.81E-07 | 1.15E-06 |
| SNHG25 | 0.9784723 | 28.38226755 | 4.858315035 | 7.45E-24 | 2.15E-22 |
| AC092171.1 | 0.102942487 | 0.440092306 | 2.095967612 | 5.41E-15 | 3.87E-14 |
| POC1B-AS1 | 0.188071487 | 0.48520113 | 1.367301771 | 1.95E-20 | 3.27E-19 |
| AC022211.1 | 0.395256635 | 0.826667914 | 1.064518212 | 2.04E-05 | 3.95E-05 |
| AL121906.2 | 0.180087793 | 0.475095252 | 1.399516396 | 8.31E-12 | 3.69E-11 |
| AC005180.1 | 1.279109807 | 0.165276659 | -2.95218522 | 2.39E-26 | 1.58E-24 |
| AC024940.5 | 0.149169785 | 0.414255507 | 1.473565534 | 2.71E-08 | 7.65E-08 |
| AC009093.1 | 0.04041893 | 0.331937082 | 3.037806771 | 8.43E-16 | 7.01E-15 |
| TFAP2A-AS1 | 0.043727377 | 0.548844643 | 3.649789118 | 1.21E-17 | 1.28E-16 |
| RTCA-AS1 | 1.05002912 | 0.462768146 | -1.182067872 | 5.13E-19 | 6.57E-18 |
| AL354696.1 | 0.591581504 | 1.289350051 | 1.123995148 | 5.07E-12 | 2.33E-11 |
| AC005089.1 | 0.018048631 | 0.457861277 | 4.664949275 | 4.68E-28 | 6.75E-26 |
| AC078860.2 | 0.070240258 | 0.712270453 | 3.342055105 | 8.68E-16 | 7.17E-15 |
| AC124319.1 | 0.11058977 | 1.603762407 | 3.858170581 | 1.22E-23 | 3.40E-22 |
| WASL-DT | 5.603406486 | 2.607232239 | -1.103785057 | 1.70E-24 | 5.63E-23 |
| AC138393.2 | 0.125559152 | 0.374704568 | 1.577386378 | 0.002103219 | 0.003142945 |
| AC005519.1 | 0.23341097 | 0.50638313 | 1.117356972 | 6.57E-08 | 1.78E-07 |
| AC009704.2 | 0.099239372 | 0.303689662 | 1.613613282 | 0.000184227 | 0.000318484 |
| AL080317.1 | 0.139723464 | 0.502454698 | 1.84641921 | 1.31E-13 | 7.51E-13 |
| AC104825.1 | 0.984847372 | 0.431950829 | -1.189033066 | 4.11E-19 | 5.44E-18 |
| AL096828.3 | 0.140496449 | 0.541225202 | 1.945695356 | 5.21E-17 | 5.10E-16 |
| LINC02381 | 1.969003611 | 0.722965656 | -1.445466736 | 2.99E-23 | 7.91E-22 |
| CNIH3-AS2 | 0.030513894 | 0.271986597 | 3.155997342 | 2.94E-13 | 1.59E-12 |
| AL359880.1 | 0.051134152 | 0.40668492 | 2.991552428 | 0.002511346 | 0.003710899 |
| U73166.1 | 0.077623882 | 0.26477513 | 1.770195122 | 3.03E-15 | 2.28E-14 |
| AC134312.5 | 0.06200588 | 0.290634212 | 2.228727602 | 1.40E-11 | 6.01E-11 |
| AL109614.1 | 0.276686026 | 1.260361281 | 2.187515654 | 1.77E-11 | 7.53E-11 |
| PRR7-AS1 | 0.095042586 | 0.602323034 | 2.663891436 | 2.82E-27 | 2.75E-25 |
| AL133243.3 | 0.152838869 | 0.367048289 | 1.263958387 | 0.000132227 | 0.000234202 |
| FAM83C-AS1 | 0.055343374 | 0.280670266 | 2.342393719 | 9.65E-11 | 3.84E-10 |
| AC106820.3 | 0.210297682 | 0.57501009 | 1.451154326 | 9.69E-12 | 4.26E-11 |
| AL033397.2 | 0.106618643 | 0.252938543 | 1.246327172 | 0.001717305 | 0.002603021 |
| AC010168.1 | 0.06259275 | 0.229028512 | 1.871459745 | 0.000360892 | 0.000607355 |
| AC108058.1 | 0.263688078 | 0.654085291 | 1.310646427 | 0.011009816 | 0.014845012 |
| AC144831.1 | 0.886248223 | 0.262646255 | -1.754589814 | 2.19E-23 | 5.88E-22 |
| AC005261.1 | 2.963261664 | 6.07129307 | 1.03481779 | 1.06E-15 | 8.68E-15 |
| AC013652.1 | 0.10292432 | 0.297273566 | 1.530207267 | 3.35E-07 | 8.17E-07 |
| AC005540.1 | 0.10614217 | 0.285884754 | 1.429435734 | 4.00E-05 | 7.48E-05 |
| JARID2-AS1 | 0.111419723 | 0.341886125 | 1.617511236 | 4.77E-06 | 9.98E-06 |
| AC016737.1 | 0.136719384 | 0.510072006 | 1.899483125 | 4.69E-16 | 4.00E-15 |
| AP001527.2 | 0.165090806 | 0.502424326 | 1.605646534 | 1.28E-13 | 7.35E-13 |
| CARNMT1-AS1 | 0.090310121 | 0.314595643 | 1.800539113 | 0.001079939 | 0.001691869 |
| AL121832.3 | 0.2080793 | 0.828639736 | 1.993611554 | 2.27E-21 | 4.45E-20 |
| Z94721.1 | 0.223810062 | 0.563427684 | 1.331955556 | 1.59E-09 | 5.38E-09 |
| AC006017.1 | 0.083145123 | 0.261269049 | 1.65183268 | 1.72E-06 | 3.81E-06 |
| AC005785.1 | 0.161737632 | 0.434980878 | 1.427296583 | 3.78E-16 | 3.24E-15 |
| AC245060.5 | 0.21112303 | 0.461826911 | 1.129268281 | 3.78E-06 | 8.08E-06 |
| LINC01703 | 0.288877229 | 1.027420774 | 1.830498757 | 4.66E-19 | 6.11E-18 |
| LINC00244 | 0.093155525 | 0.246446862 | 1.403563366 | 0.002880574 | 0.004213337 |
| AC024560.3 | 0.204560602 | 0.499470773 | 1.287871947 | 1.30E-05 | 2.59E-05 |
| AC104695.3 | 0.269574778 | 1.652731309 | 2.616094773 | 1.07E-05 | 2.16E-05 |
| AC010422.4 | 0.132829968 | 0.340986896 | 1.360135628 | 0.001021674 | 0.001603755 |
| AC020978.3 | 0.128170927 | 0.486918938 | 1.925612557 | 1.78E-05 | 3.46E-05 |
| AGAP2-AS1 | 2.243359439 | 5.080668279 | 1.17935748 | 9.51E-15 | 6.45E-14 |
| AP006621.1 | 0.14425751 | 0.46843159 | 1.699191943 | 0.000177478 | 0.000308497 |
| AC145207.8 | 0.251265747 | 0.515565129 | 1.036940674 | 0.000247553 | 0.000422437 |
| AL390195.1 | 0.159737026 | 0.412661241 | 1.369259185 | 1.67E-12 | 8.16E-12 |
| AL353708.3 | 0.137641837 | 0.409997206 | 1.574695026 | 3.25E-14 | 2.04E-13 |
| AC244517.7 | 0.126153266 | 0.446691137 | 1.824100072 | 0.020330083 | 0.026489197 |
| AC012085.2 | 1.997987316 | 0.184046438 | -3.440405692 | 9.35E-20 | 1.35E-18 |
| MAGI2-AS3 | 0.930185485 | 0.45147588 | -1.042869515 | 1.10E-14 | 7.39E-14 |
| KCNIP2-AS1 | 0.147564459 | 0.321595122 | 1.123900237 | 2.76E-11 | 1.16E-10 |
| LINC01235 | 0.217308642 | 0.601490421 | 1.468796214 | 1.49E-07 | 3.82E-07 |
| AP000695.1 | 0.080768118 | 0.297693357 | 1.881969203 | 1.84E-10 | 7.04E-10 |
| AC130456.3 | 0.431905469 | 0.959257902 | 1.15120316 | 1.80E-07 | 4.56E-07 |
| SNHG15 | 2.273811252 | 8.536094812 | 1.908463699 | 3.06E-31 | 1.41E-28 |
| AL442067.2 | 0.071206659 | 0.365026483 | 2.357917061 | 5.59E-06 | 1.16E-05 |
| AC010319.4 | 0.210364482 | 0.520742648 | 1.307679428 | 4.03E-15 | 2.96E-14 |
| AC131971.1 | 0.050196618 | 0.584171775 | 3.540730581 | 1.07E-06 | 2.43E-06 |
| AL450344.3 | 0.052085959 | 0.266545574 | 2.355415802 | 0.012076002 | 0.016227447 |
| MED8-AS1 | 0.235326317 | 0.574699444 | 1.288144981 | 4.24E-12 | 1.96E-11 |
| AL807757.2 | 0.026737249 | 0.222866686 | 3.059258053 | 9.34E-06 | 1.89E-05 |
| AC020915.1 | 0.23089727 | 0.660737175 | 1.516825401 | 1.71E-06 | 3.78E-06 |
| AC020612.2 | 0.052624691 | 0.215088919 | 2.031121452 | 9.95E-05 | 0.000178184 |
| AC011472.4 | 1.037795435 | 0.391158815 | -1.407695712 | 1.74E-13 | 9.75E-13 |
| AC091057.1 | 0.489732502 | 1.004163185 | 1.035927888 | 4.66E-13 | 2.44E-12 |
| AP000866.6 | 0.14995687 | 0.488472529 | 1.703729813 | 3.90E-07 | 9.43E-07 |
| AC040934.1 | 0.066639288 | 0.242080269 | 1.861040597 | 4.07E-06 | 8.64E-06 |
| AC008764.8 | 0.187886118 | 0.376017983 | 1.000943184 | 3.45E-10 | 1.27E-09 |
| AC245128.3 | 0.133257241 | 0.417817837 | 1.648660151 | 0.005082264 | 0.007182148 |
| DICER1-AS1 | 0.417629368 | 0.84018339 | 1.008481098 | 2.28E-12 | 1.09E-11 |
| AC016586.1 | 0.201468729 | 0.41373445 | 1.038149162 | 0.01139957 | 0.015344459 |
| ZNF252P-AS1 | 0.091247857 | 0.235293191 | 1.366596999 | 4.05E-11 | 1.67E-10 |
| AC133540.1 | 0.023298887 | 0.254045544 | 3.446754241 | 1.62E-08 | 4.75E-08 |
| H3-3A-DT | 0.155319556 | 0.320366236 | 1.044482617 | 0.020134832 | 0.026256351 |
| GAS8-AS1 | 0.06951832 | 0.305232592 | 2.13444389 | 1.71E-08 | 4.98E-08 |
| LINC01376 | 0.112246365 | 0.2388978 | 1.089724848 | 2.68E-05 | 5.11E-05 |
| PVT1 | 0.385296806 | 3.037377657 | 2.978784168 | 2.06E-32 | 3.27E-29 |
| AC078883.2 | 0.02927418 | 0.290657558 | 3.311619762 | 9.86E-05 | 0.000176811 |
| AL049539.1 | 0.04961275 | 0.611665459 | 3.623959983 | 2.41E-16 | 2.14E-15 |
| SNHG1 | 4.171986478 | 15.18186732 | 1.863542862 | 1.65E-28 | 2.91E-26 |
| AP006621.2 | 0.616933306 | 1.486353876 | 1.268591199 | 3.94E-07 | 9.52E-07 |
| CASC19 | 0.170201774 | 4.168201986 | 4.614107207 | 9.14E-30 | 2.42E-27 |
| SLC12A9-AS1 | 0.640695596 | 3.145136438 | 2.295411624 | 1.61E-25 | 8.26E-24 |
| AC018521.6 | 1.460462467 | 0.633388234 | -1.20526331 | 2.27E-20 | 3.71E-19 |
| ZDHHC20-IT1 | 0.107835984 | 0.566574856 | 2.393427907 | 7.98E-15 | 5.48E-14 |
| AC109460.1 | 0.114956443 | 0.278693713 | 1.277593129 | 1.64E-13 | 9.22E-13 |
| AC007038.1 | 0.458514078 | 1.12498131 | 1.294863097 | 2.12E-09 | 7.00E-09 |
| AL031275.1 | 0.0819643 | 0.623066555 | 2.926318694 | 4.88E-07 | 1.16E-06 |
| LINC02487 | 0.328291649 | 1.200451274 | 1.870526889 | 1.43E-15 | 1.14E-14 |
| Z82243.1 | 0.183036731 | 0.82327382 | 2.169239159 | 5.40E-15 | 3.87E-14 |
| SFTA1P | 0.968479528 | 0.180176865 | -2.426307773 | 2.13E-24 | 6.88E-23 |
| ARHGAP27P1-BPTFP1-KPNA2P3 | 0.679084024 | 1.42903792 | 1.073382202 | 2.71E-09 | 8.82E-09 |
| GNG12-AS1 | 0.548990844 | 0.237450124 | -1.209157577 | 4.07E-22 | 9.24E-21 |
| AL596247.1 | 0.053682348 | 0.351635321 | 2.711560325 | 0.004144817 | 0.005963576 |
| PHACTR2-AS1 | 0.009396909 | 0.22012561 | 4.549996842 | 0.016389809 | 0.021639457 |
| AL359922.2 | 0.049693256 | 0.383452192 | 2.947924729 | 5.14E-19 | 6.57E-18 |
| FOCAD-AS1 | 0.088749977 | 0.279997536 | 1.657595476 | 2.54E-08 | 7.20E-08 |
| RHOQ-AS1 | 0.068557473 | 0.312677322 | 2.189288756 | 0.002727197 | 0.004007464 |
| AP002907.1 | 0.191426653 | 0.62694437 | 1.711545723 | 1.30E-10 | 5.09E-10 |
| AC006042.1 | 1.503536101 | 3.638200486 | 1.274865537 | 4.58E-10 | 1.67E-09 |
| LINC02362 | 1.407778369 | 0.479875561 | -1.552687978 | 1.94E-16 | 1.74E-15 |
| AL356299.2 | 0.097478656 | 0.828875768 | 3.087997624 | 2.14E-25 | 1.03E-23 |
| AL117332.1 | 0.373801044 | 0.888888502 | 1.249731866 | 7.19E-15 | 5.00E-14 |
| IGFBP7-AS1 | 0.03630719 | 0.272879325 | 2.909935896 | 0.000172159 | 0.00029958 |
| AC015813.1 | 0.943021457 | 2.682708793 | 1.508327956 | 3.77E-12 | 1.75E-11 |
| AL512328.1 | 0.510847131 | 0.251962899 | -1.01968032 | 4.94E-15 | 3.58E-14 |
| AC005096.1 | 0.019402173 | 0.237671227 | 3.614677125 | 7.09E-08 | 1.91E-07 |
| AC007216.3 | 0.089577281 | 0.357954971 | 1.998573339 | 6.74E-14 | 3.98E-13 |
| UBE2R2-AS1 | 0.182629138 | 0.58592895 | 1.681808774 | 5.79E-07 | 1.36E-06 |
| SOCAR | 0.077457128 | 0.225809533 | 1.543636478 | 5.70E-07 | 1.35E-06 |
| AC114730.3 | 0.257598529 | 0.551038621 | 1.097029082 | 1.46E-07 | 3.76E-07 |
| TSPOAP1-AS1 | 0.334399204 | 0.96073801 | 1.522571653 | 2.57E-13 | 1.41E-12 |
| CRYZL2P-SEC16B | 0.089692448 | 0.232199429 | 1.37230601 | 2.29E-08 | 6.51E-08 |
| AC009269.5 | 0.095175876 | 0.469111197 | 2.301262081 | 0.000243272 | 0.000416026 |
| TH2LCRR | 0.087470788 | 0.222234092 | 1.345206966 | 0.003774786 | 0.005455906 |
| AL133520.1 | 0.785045159 | 1.665057546 | 1.084724487 | 1.42E-10 | 5.54E-10 |
| NKILA | 0.373243237 | 1.368616246 | 1.874529953 | 2.11E-14 | 1.36E-13 |
| AC007216.2 | 0.093379952 | 0.34528684 | 1.886610593 | 2.35E-07 | 5.87E-07 |
| AL512656.1 | 0.059639334 | 0.255444269 | 2.098672517 | 7.71E-09 | 2.35E-08 |
| N4BP2L2-IT2 | 0.248366461 | 0.804158914 | 1.695010262 | 3.38E-07 | 8.23E-07 |
| AC008760.1 | 0.620987595 | 1.258506657 | 1.019076494 | 2.50E-11 | 1.06E-10 |
| AL355802.3 | 0.172142742 | 0.567997792 | 1.722279964 | 1.64E-15 | 1.29E-14 |
| MIR17HG | 0.15078259 | 1.328280357 | 3.139017923 | 1.20E-24 | 4.32E-23 |
| BCL2L1-AS1 | 0.088384807 | 0.791516667 | 3.16274943 | 0.023327399 | 0.029981893 |
| AC018653.3 | 0.422949549 | 1.129491373 | 1.417115765 | 3.09E-13 | 1.67E-12 |
| MATN1-AS1 | 0.20145196 | 0.417911062 | 1.052760107 | 6.95E-15 | 4.86E-14 |
| Z83843.1 | 0.616480195 | 2.875733587 | 2.221803576 | 1.32E-06 | 2.96E-06 |
| AC027601.1 | 0.151307307 | 0.360710126 | 1.253358264 | 1.34E-13 | 7.65E-13 |
| LINC01485 | 0.027608304 | 0.350567266 | 3.666517124 | 1.04E-11 | 4.57E-11 |
| AC007497.1 | 0.052476716 | 0.224261763 | 2.095434323 | 9.50E-11 | 3.79E-10 |
| AP001628.1 | 0.192903227 | 0.800838319 | 2.053633726 | 1.64E-11 | 7.00E-11 |
| AC009996.1 | 0.129409395 | 0.451933526 | 1.804168224 | 4.72E-09 | 1.48E-08 |
| ASMTL-AS1 | 0.832230691 | 2.449673051 | 1.557533812 | 5.86E-13 | 3.01E-12 |
| AL442067.1 | 0.135667629 | 0.698874427 | 2.364956727 | 4.74E-09 | 1.48E-08 |
| AP006545.2 | 0.105643301 | 0.221168842 | 1.065946874 | 0.007883989 | 0.010870453 |
| LINC00630 | 0.223518703 | 0.469987424 | 1.072226597 | 2.08E-13 | 1.16E-12 |
| AL596223.2 | 0.103338295 | 0.541042739 | 2.388367576 | 1.34E-15 | 1.08E-14 |
| AC068790.5 | 0.143066868 | 0.488750058 | 1.772407265 | 5.86E-06 | 1.21E-05 |
| FMR1-IT1 | 0.354361936 | 0.731499267 | 1.045632776 | 0.001833668 | 0.002763562 |
| AP000866.2 | 1.999321475 | 0.515393639 | -1.955763829 | 1.19E-27 | 1.46E-25 |
| AC007128.2 | 0.006462014 | 0.339908642 | 5.717019375 | 1.20E-23 | 3.40E-22 |
| ACSL3-AS1 | 0.048828505 | 0.213012066 | 2.125139648 | 0.000189844 | 0.000327125 |
| AC016949.1 | 0.108518807 | 0.410124616 | 1.918117246 | 0.000417779 | 0.000692806 |
| AC036176.3 | 0.008412983 | 0.254658975 | 4.919805395 | 6.76E-09 | 2.07E-08 |
| RNF32-AS1 | 0.04493153 | 0.286190861 | 2.671177509 | 3.39E-17 | 3.36E-16 |
| AC073957.3 | 0.673927511 | 1.471646287 | 1.126765633 | 1.60E-08 | 4.71E-08 |
| AL022157.1 | 0.162024936 | 0.390953316 | 1.270780476 | 4.83E-06 | 1.01E-05 |
| AL020997.2 | 0.079434764 | 0.386256095 | 2.281715274 | 0.000674743 | 0.001084922 |

**Table S5** 15 lncRNAs with different expressions as independent prognostic factors for colorectal cancer

| id | coef | HR | HR.95L | HR.95H | pvalue |
| --- | --- | --- | --- | --- | --- |
| AP003555.1 | 0.24937153 | 1.283218698 | 1.105416297 | 1.489620004 | 0.001049258 |
| AC099850.3 | -0.053038736 | 0.948343277 | 0.903261392 | 0.995675204 | 0.032811736 |
| AL031985.3 | -0.312537602 | 0.731588119 | 0.521253682 | 1.026795963 | 0.070751211 |
| LINC01857 | 0.281714283 | 1.325399977 | 1.063260317 | 1.652168402 | 0.012227529 |
| `STPG3-AS1` | -0.681499604 | 0.505857837 | 0.270519149 | 0.945929899 | 0.032840585 |
| AL137782.1 | -0.991652653 | 0.370963111 | 0.205665618 | 0.669113444 | 0.000983953 |
| AC124067.4 | -0.045086352 | 0.955914933 | 0.926391772 | 0.986378967 | 0.00485056 |
| AC012313.5 | -1.894993668 | 0.150319287 | 0.031641943 | 0.714111894 | 0.017149973 |
| AC083900.1 | 0.549586717 | 1.732536842 | 1.29795475 | 2.312626007 | 0.000191592 |
| AC010973.2 | 0.477246962 | 1.611631406 | 1.170516567 | 2.21898251 | 0.003445719 |
| `ALMS1-IT1` | 0.51192616 | 1.668501903 | 1.103212167 | 2.523448058 | 0.01529472 |
| AC013652.1 | 0.747463365 | 2.111636765 | 1.201848805 | 3.710125441 | 0.009339973 |
| AC133540.1 | 0.338930307 | 1.403445532 | 1.024155695 | 1.923203055 | 0.034992287 |
| AP006621.2 | 0.139819911 | 1.150066666 | 0.989809297 | 1.336270875 | 0.06782302 |
| AC018653.3 | 0.170121128 | 1.185448434 | 0.944275909 | 1.488217559 | 0.142674824 |

.

**Table S6.** Gene set enrichment analyses (GSEA)of the ferroptosis-associated lncRNAs.

| NAME | SIZE | ES | NES | NOM p-val | FDR q-val | FWER p-val |
| --- | --- | --- | --- | --- | --- | --- |
| KEGG_GLYCOSAMINOGLYCAN_BIOSYNTHESIS_CHONDROITIN_SULFATE | 22 | 0.7883432 | 2.1231606 | 0 | 0.017604401 | 0.023 |
| KEGG_AUTOIMMUNE_THYROID_DISEASE | 50 | 0.70849425 | 2.1116872 | 0 | 0.01006746 | 0.027 |
| KEGG_INTESTINAL_IMMUNE_NETWORK_FOR_IGA_PRODUCTION | 46 | 0.76747084 | 2.0275016 | 0 | 0.025635296 | 0.065 |
| KEGG_ASTHMA | 28 | 0.77967846 | 1.9888488 | 0.006012024 | 0.032541618 | 0.091 |
| KEGG_TASTE_TRANSDUCTION | 51 | 0.5653937 | 1.9238939 | 0 | 0.050188877 | 0.15 |
| KEGG_ALLOGRAFT_REJECTION | 35 | 0.7857892 | 1.8933614 | 0.00814664 | 0.057512682 | 0.18 |
| KEGG_TYPE_I_DIABETES_MELLITUS | 41 | 0.6909608 | 1.8463233 | 0.027613413 | 0.07745403 | 0.241 |
| KEGG_AXON_GUIDANCE | 129 | 0.48454887 | 1.8132468 | 0.01417004 | 0.08888579 | 0.284 |
| KEGG_GRAFT_VERSUS_HOST_DISEASE | 37 | 0.7482744 | 1.8025501 | 0.02584493 | 0.08600461 | 0.299 |
| KEGG_NEUROACTIVE_LIGAND_RECEPTOR_INTERACTION | 270 | 0.48091313 | 1.7899774 | 0.001934236 | 0.08397221 | 0.309 |
| KEGG_PRIMARY_IMMUNODEFICIENCY | 35 | 0.6495133 | 1.7829758 | 0.022132797 | 0.080827326 | 0.321 |
| KEGG_HEMATOPOIETIC_CELL_LINEAGE | 85 | 0.59817153 | 1.7755133 | 0.023354564 | 0.07866254 | 0.33 |
| KEGG_MELANOGENESIS | 101 | 0.4682124 | 1.7726023 | 0.003984064 | 0.074515335 | 0.333 |
| KEGG_CELL_ADHESION_MOLECULES_CAMS | 131 | 0.56544524 | 1.7602919 | 0.026915114 | 0.07574518 | 0.351 |
| KEGG_VIRAL_MYOCARDITIS | 68 | 0.5550708 | 1.7407553 | 0.033402923 | 0.081990846 | 0.387 |
| KEGG_CYTOKINE_CYTOKINE_RECEPTOR_INTERACTION | 264 | 0.48588005 | 1.7382741 | 0.02096436 | 0.078227535 | 0.389 |
| KEGG_DILATED_CARDIOMYOPATHY | 90 | 0.5058873 | 1.7171228 | 0.012170386 | 0.08318853 | 0.416 |
| KEGG_VEGF_SIGNALING_PATHWAY | 76 | 0.44548675 | 1.6989555 | 0.006369427 | 0.088892594 | 0.444 |
| KEGG_CALCIUM_SIGNALING_PATHWAY | 178 | 0.43318617 | 1.6977684 | 0.009727626 | 0.084849864 | 0.444 |
| KEGG_BASAL_CELL_CARCINOMA | 55 | 0.48139933 | 1.6934344 | 0.018796992 | 0.083291836 | 0.449 |
| KEGG_GLYCEROPHOSPHOLIPID_METABOLISM | 77 | 0.4204934 | 1.693065 | 0.008179959 | 0.07932556 | 0.449 |
| KEGG_NATURAL_KILLER_CELL_MEDIATED_CYTOTOXICITY | 132 | 0.45680377 | 1.6781616 | 0.049603175 | 0.08459178 | 0.484 |
| KEGG_LEISHMANIA_INFECTION | 70 | 0.55347633 | 1.6270179 | 0.07723577 | 0.11395136 | 0.562 |
| KEGG_HYPERTROPHIC_CARDIOMYOPATHY_HCM | 83 | 0.46689576 | 1.6230189 | 0.030549899 | 0.11173033 | 0.565 |
| KEGG_ANTIGEN_PROCESSING_AND_PRESENTATION | 81 | 0.5349037 | 1.6227099 | 0.07959183 | 0.1074874 | 0.565 |
| KEGG_VASCULAR_SMOOTH_MUSCLE_CONTRACTION | 115 | 0.43750688 | 1.6084718 | 0.043824703 | 0.11222635 | 0.579 |
| KEGG_ARACHIDONIC_ACID_METABOLISM | 58 | 0.47989348 | 1.5734687 | 0.030487806 | 0.13166277 | 0.633 |
| KEGG_INOSITOL_PHOSPHATE_METABOLISM | 54 | 0.44502977 | 1.5656248 | 0.036437247 | 0.13245116 | 0.645 |
| KEGG_FC_EPSILON_RI_SIGNALING_PATHWAY | 79 | 0.40839648 | 1.5650643 | 0.046464648 | 0.12832476 | 0.645 |
| KEGG_GLYCOSAMINOGLYCAN_DEGRADATION | 21 | 0.52800506 | 1.5376798 | 0.05785124 | 0.14469726 | 0.69 |
| KEGG_ABC_TRANSPORTERS | 44 | 0.4249488 | 1.5311222 | 0.06329114 | 0.14494361 | 0.7 |
| KEGG_NOTCH_SIGNALING_PATHWAY | 47 | 0.48034155 | 1.5305759 | 0.073469386 | 0.14092469 | 0.7 |
| KEGG_FC_GAMMA_R_MEDIATED_PHAGOCYTOSIS | 96 | 0.43478417 | 1.5292908 | 0.063424945 | 0.1375661 | 0.702 |
| KEGG_GLYCOSAMINOGLYCAN_BIOSYNTHESIS_KERATAN_SULFATE | 15 | 0.5911635 | 1.5214608 | 0.08739837 | 0.13891548 | 0.708 |
| KEGG_TYPE_II_DIABETES_MELLITUS | 47 | 0.42922637 | 1.5035675 | 0.05697446 | 0.14731106 | 0.729 |
| KEGG_PHOSPHATIDYLINOSITOL_SIGNALING_SYSTEM | 76 | 0.4037276 | 1.4914982 | 0.05858586 | 0.15265569 | 0.737 |
| KEGG_LEUKOCYTE_TRANSENDOTHELIAL_MIGRATION | 116 | 0.4255373 | 1.478247 | 0.09355509 | 0.15817285 | 0.755 |
| KEGG_ECM_RECEPTOR_INTERACTION | 84 | 0.5167053 | 1.4775835 | 0.1440501 | 0.15464249 | 0.755 |
| KEGG_B_CELL_RECEPTOR_SIGNALING_PATHWAY | 75 | 0.4336482 | 1.4743263 | 0.108333334 | 0.15320995 | 0.76 |
| KEGG_GNRH_SIGNALING_PATHWAY | 101 | 0.3614599 | 1.4532818 | 0.077220075 | 0.16551939 | 0.791 |
| KEGG_CHEMOKINE_SIGNALING_PATHWAY | 188 | 0.4100458 | 1.4463675 | 0.12190083 | 0.16687202 | 0.799 |
| KEGG_LYSOSOME | 121 | 0.42203274 | 1.4153512 | 0.12244898 | 0.18890014 | 0.837 |
| KEGG_COMPLEMENT_AND_COAGULATION_CASCADES | 69 | 0.7282688 | 1.396374 | 0.045548655 | 0.20088087 | 0.861 |
| KEGG_PHENYLALANINE_METABOLISM | 18 | 0.5283638 | 1.3929607 | 0.1027668 | 0.19988668 | 0.866 |
| KEGG_JAK_STAT_SIGNALING_PATHWAY | 155 | 0.36059386 | 1.389441 | 0.116 | 0.19861603 | 0.87 |
| KEGG_HEDGEHOG_SIGNALING_PATHWAY | 56 | 0.39805537 | 1.3873416 | 0.112840466 | 0.19629695 | 0.873 |
| KEGG_T_CELL_RECEPTOR_SIGNALING_PATHWAY | 108 | 0.37725395 | 1.3775845 | 0.14484127 | 0.2003164 | 0.883 |
| KEGG_ALDOSTERONE_REGULATED_SODIUM_REABSORPTION | 42 | 0.401189 | 1.3694859 | 0.13131313 | 0.20306294 | 0.893 |
| KEGG_REGULATION_OF_ACTIN_CYTOSKELETON | 213 | 0.3574174 | 1.367817 | 0.11042945 | 0.20019239 | 0.894 |
| KEGG_STEROID_HORMONE_BIOSYNTHESIS | 55 | 0.5007734 | 1.3552039 | 0.08008213 | 0.20634903 | 0.905 |
| KEGG_FOCAL_ADHESION | 199 | 0.38668057 | 1.344284 | 0.19477911 | 0.21201053 | 0.911 |
| KEGG_ETHER_LIPID_METABOLISM | 33 | 0.39358333 | 1.3433293 | 0.114822544 | 0.20854287 | 0.911 |
| KEGG_ARRHYTHMOGENIC_RIGHT_VENTRICULAR_CARDIOMYOPATHY_ARVC | 74 | 0.39403555 | 1.3281854 | 0.1659919 | 0.2177027 | 0.919 |
| KEGG_MAPK_SIGNALING_PATHWAY | 267 | 0.3202932 | 1.326137 | 0.114989735 | 0.2152257 | 0.921 |
| KEGG_LONG_TERM_DEPRESSION | 70 | 0.34081176 | 1.3115691 | 0.13653846 | 0.22530499 | 0.932 |
| KEGG_GAP_JUNCTION | 90 | 0.33599612 | 1.2441566 | 0.20703125 | 0.28719646 | 0.975 |
| KEGG_GLYCOSAMINOGLYCAN_BIOSYNTHESIS_HEPARAN_SULFATE | 26 | 0.38110396 | 1.2418963 | 0.21414538 | 0.28437385 | 0.975 |
| KEGG_TYROSINE_METABOLISM | 42 | 0.4288598 | 1.2323024 | 0.21686748 | 0.2895054 | 0.981 |
| KEGG_CYTOSOLIC_DNA_SENSING_PATHWAY | 55 | 0.34151942 | 1.224888 | 0.21782178 | 0.29218882 | 0.982 |
| KEGG_CARDIAC_MUSCLE_CONTRACTION | 79 | 0.3543013 | 1.2220201 | 0.2128514 | 0.2900427 | 0.982 |
| KEGG_PRION_DISEASES | 35 | 0.44038358 | 1.2195084 | 0.2370518 | 0.2877502 | 0.982 |
| KEGG_METABOLISM_OF_XENOBIOTICS_BY_CYTOCHROME_P450 | 69 | 0.47222015 | 1.2171764 | 0.23076923 | 0.28551093 | 0.983 |
| KEGG_TOLL_LIKE_RECEPTOR_SIGNALING_PATHWAY | 102 | 0.33241662 | 1.2099072 | 0.24850895 | 0.28800926 | 0.983 |
| KEGG_DRUG_METABOLISM_CYTOCHROME_P450 | 71 | 0.5032663 | 1.2035084 | 0.22109534 | 0.28983596 | 0.983 |
| KEGG_PATHWAYS_IN_CANCER | 325 | 0.29316047 | 1.1994101 | 0.23541248 | 0.2895114 | 0.985 |
| KEGG_RIG_I_LIKE_RECEPTOR_SIGNALING_PATHWAY | 71 | 0.31569046 | 1.1862347 | 0.24758221 | 0.29872352 | 0.987 |
| KEGG_ADIPOCYTOKINE_SIGNALING_PATHWAY | 67 | 0.31100416 | 1.1690516 | 0.2642998 | 0.31212303 | 0.99 |
| KEGG_ALPHA_LINOLENIC_ACID_METABOLISM | 19 | 0.38738132 | 1.168915 | 0.2601626 | 0.30772516 | 0.991 |
| KEGG_LINOLEIC_ACID_METABOLISM | 29 | 0.44417092 | 1.1530689 | 0.3013972 | 0.32030955 | 0.991 |
| KEGG_MATURITY_ONSET_DIABETES_OF_THE_YOUNG | 25 | 0.4000133 | 1.1364007 | 0.31781375 | 0.3340475 | 0.992 |
| KEGG_MELANOMA | 71 | 0.29186475 | 1.0944151 | 0.3475728 | 0.3776776 | 0.997 |
| KEGG_VIBRIO_CHOLERAE_INFECTION | 54 | 0.29080573 | 1.0913639 | 0.336 | 0.37586868 | 0.997 |
| KEGG_PORPHYRIN_AND_CHLOROPHYLL_METABOLISM | 41 | 0.34953633 | 1.0488536 | 0.4078675 | 0.42100286 | 0.997 |
| KEGG_TRYPTOPHAN_METABOLISM | 40 | 0.34150895 | 1.0418036 | 0.4125 | 0.4245882 | 0.998 |
| KEGG_GLIOMA | 65 | 0.28160697 | 1.0319252 | 0.41260162 | 0.43009445 | 0.999 |
| KEGG_RETINOL_METABOLISM | 64 | 0.43357927 | 1.0113877 | 0.496994 | 0.44971964 | 0.999 |
| KEGG_NITROGEN_METABOLISM | 23 | 0.31699002 | 0.98469806 | 0.49094567 | 0.47744495 | 0.999 |
| KEGG_DORSO_VENTRAL_AXIS_FORMATION | 24 | 0.30882362 | 0.9669545 | 0.49284253 | 0.49395844 | 1 |
| KEGG_HISTIDINE_METABOLISM | 29 | 0.30805585 | 0.9326694 | 0.5188867 | 0.53191197 | 1 |
| KEGG_SYSTEMIC_LUPUS_ERYTHEMATOSUS | 135 | 0.336145 | 0.9271198 | 0.5655914 | 0.53227776 | 1 |
| KEGG_DRUG_METABOLISM_OTHER_ENZYMES | 51 | 0.32981393 | 0.9003696 | 0.6441718 | 0.5590372 | 1 |
| KEGG_STARCH_AND_SUCROSE_METABOLISM | 52 | 0.28526342 | 0.88821346 | 0.5968992 | 0.56860083 | 1 |
| KEGG_GLYCOSPHINGOLIPID_BIOSYNTHESIS_LACTO_AND_NEOLACTO_SERIES | 26 | 0.26410753 | 0.8602161 | 0.609901 | 0.5986728 | 1 |
| KEGG_O_GLYCAN_BIOSYNTHESIS | 30 | 0.27134678 | 0.8391887 | 0.6180698 | 0.6208253 | 1 |
| KEGG_PENTOSE_AND_GLUCURONATE_INTERCONVERSIONS | 28 | 0.3041387 | 0.8117461 | 0.6774848 | 0.64961034 | 1 |
| KEGG_ASCORBATE_AND_ALDARATE_METABOLISM | 25 | 0.31594914 | 0.7889253 | 0.6938776 | 0.6728347 | 1 |
| KEGG_BASAL_TRANSCRIPTION_FACTORS | 35 | -0.7458844 | -2.2766268 | 0 | 0.000829 | 0.001 |
| KEGG_CELL_CYCLE | 125 | -0.6619845 | -2.244291 | 0 | 0.001229483 | 0.003 |
| KEGG_UBIQUITIN_MEDIATED_PROTEOLYSIS | 135 | -0.57109886 | -2.2242334 | 0 | 0.001516023 | 0.004 |
| KEGG_RNA_DEGRADATION | 59 | -0.66259426 | -2.1673303 | 0 | 0.004153824 | 0.013 |
| KEGG_AMINOACYL_TRNA_BIOSYNTHESIS | 41 | -0.7790586 | -2.0486355 | 0 | 0.015127852 | 0.061 |
| KEGG_N_GLYCAN_BIOSYNTHESIS | 46 | -0.6143155 | -2.0221477 | 0.006036217 | 0.016806623 | 0.078 |
| KEGG_NUCLEOTIDE_EXCISION_REPAIR | 44 | -0.66718286 | -1.9880179 | 0.005870841 | 0.02056199 | 0.102 |
| KEGG_MISMATCH_REPAIR | 23 | -0.7693786 | -1.9878737 | 0.003952569 | 0.01799174 | 0.102 |
| KEGG_SPLICEOSOME | 127 | -0.6624745 | -1.97366 | 0.012269938 | 0.018075926 | 0.111 |
| KEGG_HOMOLOGOUS_RECOMBINATION | 28 | -0.677695 | -1.9361048 | 0.008097166 | 0.023965701 | 0.144 |
| KEGG_OOCYTE_MEIOSIS | 113 | -0.5016899 | -1.9012209 | 0.012 | 0.031342342 | 0.178 |
| KEGG_CITRATE_CYCLE_TCA_CYCLE | 31 | -0.72037363 | -1.873007 | 0.01369863 | 0.037941154 | 0.214 |
| KEGG_DNA_REPLICATION | 36 | -0.74004406 | -1.8452927 | 0.022312373 | 0.045016382 | 0.255 |
| KEGG_LYSINE_DEGRADATION | 44 | -0.5422983 | -1.8291193 | 0.011881189 | 0.04749828 | 0.277 |
| KEGG_ENDOMETRIAL_CANCER | 52 | -0.50750774 | -1.8182813 | 0.007920792 | 0.04864752 | 0.293 |
| KEGG_PROPANOATE_METABOLISM | 33 | -0.63355845 | -1.8106346 | 0.01923077 | 0.04901489 | 0.305 |
| KEGG_BIOSYNTHESIS_OF_UNSATURATED_FATTY_ACIDS | 22 | -0.6356843 | -1.8011568 | 0.00814664 | 0.05069382 | 0.324 |
| KEGG_PURINE_METABOLISM | 159 | -0.428175 | -1.7766151 | 0.005988024 | 0.05759967 | 0.364 |
| KEGG_STEROID_BIOSYNTHESIS | 17 | -0.7323512 | -1.773346 | 0.019607844 | 0.055983443 | 0.367 |
| KEGG_PROTEIN_EXPORT | 24 | -0.6883168 | -1.7510833 | 0.03258656 | 0.06405963 | 0.4 |
| KEGG_ONE_CARBON_POOL_BY_FOLATE | 17 | -0.6802977 | -1.7427982 | 0.029069768 | 0.06532584 | 0.419 |
| KEGG_PEROXISOME | 78 | -0.55032176 | -1.7422522 | 0.029821074 | 0.062483273 | 0.419 |
| KEGG_GLYCOSYLPHOSPHATIDYLINOSITOL_GPI_ANCHOR_BIOSYNTHESIS | 25 | -0.57471246 | -1.7079071 | 0.031809144 | 0.077515975 | 0.47 |
| KEGG_SELENOAMINO_ACID_METABOLISM | 26 | -0.5587687 | -1.6795806 | 0.035363458 | 0.08935109 | 0.509 |
| KEGG_ERBB_SIGNALING_PATHWAY | 87 | -0.4285697 | -1.6665268 | 0.014056225 | 0.0932439 | 0.532 |
| KEGG_PYRIMIDINE_METABOLISM | 98 | -0.47101834 | -1.6519257 | 0.04054054 | 0.09859441 | 0.551 |
| KEGG_PROGESTERONE_MEDIATED_OOCYTE_MATURATION | 85 | -0.41912198 | -1.6130351 | 0.04312115 | 0.118634 | 0.606 |
| KEGG_TERPENOID_BACKBONE_BIOSYNTHESIS | 15 | -0.68100846 | -1.5949473 | 0.07632094 | 0.12671986 | 0.632 |
| KEGG_VALINE_LEUCINE_AND_ISOLEUCINE_DEGRADATION | 44 | -0.5670017 | -1.5690494 | 0.08030593 | 0.142472 | 0.686 |
| KEGG_THYROID_CANCER | 29 | -0.46524838 | -1.5583248 | 0.047058824 | 0.14628391 | 0.707 |
| KEGG_COLORECTAL_CANCER | 62 | -0.4201558 | -1.5565747 | 0.04563492 | 0.1427296 | 0.708 |
| KEGG_PYRUVATE_METABOLISM | 40 | -0.5101716 | -1.5488127 | 0.0655106 | 0.14423707 | 0.717 |
| KEGG_P53_SIGNALING_PATHWAY | 68 | -0.41871578 | -1.5462891 | 0.053435113 | 0.14172135 | 0.719 |
| KEGG_ALANINE_ASPARTATE_AND_GLUTAMATE_METABOLISM | 32 | -0.4936675 | -1.5455818 | 0.048543688 | 0.13792315 | 0.719 |
| KEGG_CYSTEINE_AND_METHIONINE_METABOLISM | 34 | -0.49316835 | -1.5242331 | 0.04809619 | 0.14922433 | 0.743 |
| KEGG_PENTOSE_PHOSPHATE_PATHWAY | 27 | -0.50906855 | -1.5107899 | 0.08429119 | 0.15460822 | 0.758 |
| KEGG_CHRONIC_MYELOID_LEUKEMIA | 73 | -0.40536162 | -1.4970484 | 0.08219178 | 0.1611755 | 0.777 |
| KEGG_BASE_EXCISION_REPAIR | 35 | -0.51766753 | -1.4651043 | 0.12175649 | 0.18369603 | 0.825 |
| KEGG_GLUTATHIONE_METABOLISM | 49 | -0.44767195 | -1.4606202 | 0.08704062 | 0.1826592 | 0.831 |
| KEGG_PROSTATE_CANCER | 89 | -0.37878913 | -1.4491682 | 0.0806142 | 0.18808663 | 0.842 |
| KEGG_HUNTINGTONS_DISEASE | 182 | -0.3972442 | -1.4071084 | 0.17159763 | 0.22233619 | 0.88 |
| KEGG_ADHERENS_JUNCTION | 73 | -0.404457 | -1.4011644 | 0.15009746 | 0.22312084 | 0.889 |
| KEGG_BUTANOATE_METABOLISM | 34 | -0.4921945 | -1.3780429 | 0.14367816 | 0.24036138 | 0.905 |
| KEGG_NICOTINATE_AND_NICOTINAMIDE_METABOLISM | 24 | -0.41617188 | -1.3719302 | 0.116504855 | 0.24113543 | 0.908 |
| KEGG_INSULIN_SIGNALING_PATHWAY | 137 | -0.31960356 | -1.3630692 | 0.09218437 | 0.24452668 | 0.913 |
| KEGG_ENDOCYTOSIS | 181 | -0.3329906 | -1.3571227 | 0.11857708 | 0.24547628 | 0.918 |
| KEGG_APOPTOSIS | 87 | -0.3649657 | -1.3501099 | 0.13894325 | 0.24696247 | 0.925 |
| KEGG_NEUROTROPHIN_SIGNALING_PATHWAY | 126 | -0.3427171 | -1.3452909 | 0.15079366 | 0.24696541 | 0.927 |
| KEGG_RIBOFLAVIN_METABOLISM | 16 | -0.42307565 | -1.3330575 | 0.13680154 | 0.25451 | 0.934 |
| KEGG_PROTEASOME | 46 | -0.49615422 | -1.3187954 | 0.2644135 | 0.26510575 | 0.941 |
| KEGG_EPITHELIAL_CELL_SIGNALING_IN_HELICOBACTER_PYLORI_INFECTION | 68 | -0.3577571 | -1.3143125 | 0.14722754 | 0.26432782 | 0.943 |
| KEGG_NOD_LIKE_RECEPTOR_SIGNALING_PATHWAY | 62 | -0.3828412 | -1.3049977 | 0.1923077 | 0.26803875 | 0.947 |
| KEGG_SNARE_INTERACTIONS_IN_VESICULAR_TRANSPORT | 38 | -0.38607323 | -1.3005589 | 0.16962525 | 0.2680201 | 0.951 |
| KEGG_AMINO_SUGAR_AND_NUCLEOTIDE_SUGAR_METABOLISM | 44 | -0.39610055 | -1.2883936 | 0.18503937 | 0.2754981 | 0.959 |
| KEGG_PANTOTHENATE_AND_COA_BIOSYNTHESIS | 16 | -0.4493631 | -1.272711 | 0.1640625 | 0.28656143 | 0.967 |
| KEGG_BLADDER_CANCER | 42 | -0.35054645 | -1.2684515 | 0.15953307 | 0.28616288 | 0.969 |
| KEGG_VASOPRESSIN_REGULATED_WATER_REABSORPTION | 44 | -0.3652171 | -1.2668324 | 0.1809145 | 0.28302366 | 0.969 |
| KEGG_SMALL_CELL_LUNG_CANCER | 84 | -0.3406389 | -1.2621391 | 0.19688109 | 0.28315726 | 0.971 |
| KEGG_NON_SMALL_CELL_LUNG_CANCER | 54 | -0.342349 | -1.2587408 | 0.1891892 | 0.28184748 | 0.972 |
| KEGG_TIGHT_JUNCTION | 132 | -0.2956906 | -1.2326664 | 0.19315895 | 0.3042858 | 0.981 |
| KEGG_GALACTOSE_METABOLISM | 26 | -0.39844778 | -1.2324289 | 0.22568093 | 0.29950896 | 0.981 |
| KEGG_AMYOTROPHIC_LATERAL_SCLEROSIS_ALS | 53 | -0.3225959 | -1.2317744 | 0.18395303 | 0.29530713 | 0.981 |
| KEGG_RENAL_CELL_CARCINOMA | 70 | -0.3366617 | -1.2287492 | 0.22440945 | 0.29411992 | 0.982 |
| KEGG_PANCREATIC_CANCER | 70 | -0.33504683 | -1.2151207 | 0.22851562 | 0.30272597 | 0.986 |
| KEGG_FATTY_ACID_METABOLISM | 42 | -0.46037197 | -1.2095653 | 0.25904763 | 0.3039364 | 0.988 |
| KEGG_OTHER_GLYCAN_DEGRADATION | 16 | -0.47974095 | -1.203801 | 0.251938 | 0.30554408 | 0.989 |
| KEGG_WNT_SIGNALING_PATHWAY | 151 | -0.29023874 | -1.1952026 | 0.21906693 | 0.30932373 | 0.989 |
| KEGG_PATHOGENIC_ESCHERICHIA_COLI_INFECTION | 56 | -0.3517906 | -1.1938394 | 0.25048545 | 0.30626592 | 0.989 |
| KEGG_RNA_POLYMERASE | 29 | -0.41112685 | -1.1883268 | 0.26907632 | 0.30779496 | 0.989 |
| KEGG_RENIN_ANGIOTENSIN_SYSTEM | 17 | -0.40101126 | -1.1831985 | 0.264 | 0.30852368 | 0.99 |
| KEGG_PRIMARY_BILE_ACID_BIOSYNTHESIS | 16 | -0.52398604 | -1.1791663 | 0.27559054 | 0.3086336 | 0.99 |
| KEGG_MTOR_SIGNALING_PATHWAY | 52 | -0.30516893 | -1.1773758 | 0.2407045 | 0.30624682 | 0.99 |
| KEGG_ALZHEIMERS_DISEASE | 166 | -0.3319833 | -1.1675588 | 0.30769232 | 0.3118029 | 0.992 |
| KEGG_ACUTE_MYELOID_LEUKEMIA | 57 | -0.32806477 | -1.161171 | 0.2826923 | 0.3140822 | 0.993 |
| KEGG_TGF_BETA_SIGNALING_PATHWAY | 86 | -0.31103915 | -1.1528193 | 0.27689242 | 0.3189281 | 0.994 |
| KEGG_ARGININE_AND_PROLINE_METABOLISM | 54 | -0.35527378 | -1.1019746 | 0.31746033 | 0.36887315 | 0.998 |
| KEGG_GLYCOLYSIS_GLUCONEOGENESIS | 62 | -0.34341255 | -1.0899546 | 0.36068702 | 0.37790293 | 1 |
| KEGG_PARKINSONS_DISEASE | 130 | -0.36232337 | -1.0786158 | 0.39880952 | 0.3860984 | 1 |
| KEGG_PROXIMAL_TUBULE_BICARBONATE_RECLAMATION | 23 | -0.34183663 | -1.0576005 | 0.4039604 | 0.40482384 | 1 |
| KEGG_SPHINGOLIPID_METABOLISM | 39 | -0.31649578 | -1.0448214 | 0.38658777 | 0.41494736 | 1 |
| KEGG_GLYCOSPHINGOLIPID_BIOSYNTHESIS_GANGLIO_SERIES | 15 | -0.38652042 | -1.0378321 | 0.414 | 0.41824603 | 1 |
| KEGG_LONG_TERM_POTENTIATION | 70 | -0.2609027 | -1.036326 | 0.4054054 | 0.41463313 | 1 |
| KEGG_GLYCEROLIPID_METABOLISM | 49 | -0.26392016 | -1.0250913 | 0.42344046 | 0.4226436 | 1 |
| KEGG_GLYOXYLATE_AND_DICARBOXYLATE_METABOLISM | 16 | -0.41099647 | -1.0142559 | 0.43495145 | 0.43037364 | 1 |
| KEGG_OXIDATIVE_PHOSPHORYLATION | 132 | -0.3420037 | -0.9941544 | 0.47454175 | 0.44840345 | 1 |
| KEGG_FRUCTOSE_AND_MANNOSE_METABOLISM | 34 | -0.3215206 | -0.9941531 | 0.46911198 | 0.44318947 | 1 |
| KEGG_BETA_ALANINE_METABOLISM | 22 | -0.35442787 | -0.99411786 | 0.4509804 | 0.4381031 | 1 |
| KEGG_REGULATION_OF_AUTOPHAGY | 35 | -0.28827068 | -0.97675115 | 0.488 | 0.45299682 | 1 |
| KEGG_PPAR_SIGNALING_PATHWAY | 69 | -0.31821692 | -0.9666424 | 0.48697394 | 0.45951882 | 1 |
| KEGG_OLFACTORY_TRANSDUCTION | 386 | -0.2583286 | -0.75466686 | 0.74390244 | 0.7368818 | 1 |
| KEGG_GLYCINE_SERINE_AND_THREONINE_METABOLISM | 31 | -0.30224857 | -0.702664 | 0.81496066 | 0.7968464 | 1 |
| KEGG_RIBOSOME | 88 | -0.22069497 | -0.5042355 | 0.82608694 | 0.9633171 | 1 |
